1 **Polygenic scores for autism are associated with neurite density in**  
2 **adults and children from the general population**

3 Running head: Autism PGS and cortical structure

4 Yuanjun Gu, Msc<sup>1,2</sup>; Eva Maria-Stauffer, PhD<sup>1</sup>; Saashi A. Bedford<sup>1,2</sup>, MSc; APEX  
5 consortium, iPSYCH-autism consortium, Rafael Romero-Garcia<sup>1,3</sup>, PhD; Jakob Grove<sup>4,5,6,7</sup>,  
6 PhD; Anders D. Børglum<sup>4,5,6</sup>, PhD; Hilary Martin<sup>8</sup>, PhD; Simon Baron-Cohen<sup>2,9</sup>, PhD;  
7 Richard A.I. Bethlehem<sup>9</sup>, PhD; Varun Warriar<sup>1,8,9</sup>, PhD

- 8 1. Department of Psychiatry, University of Cambridge, Cambridge, CB2 8AH  
9 2. Autism Research Centre, Department of Psychiatry, University of Cambridge,  
10 Cambridge, CB2 8AH, UK  
11 3. Department of Medical Physiology and Biophysics, Instituto de Biomedicina de  
12 Sevilla (IBiS), HUVR/CSIC/Universidad de Sevilla/CIBERSAM, ISCIII, 41013,  
13 Sevilla, Spain, 41013  
14 4. The Lundbeck Foundation Initiative for Integrative Psychiatric Research, iPSYCH,  
15 Aarhus, 8210, Denmark  
16 5. Center for Genomics and Personalized Medicine (CGPM), Aarhus University,  
17 Aarhus, 8000, Denmark  
18 6. Department of Biomedicine (Human Genetics) and iSEQ Center, Aarhus University,  
19 Aarhus, 8000, Denmark  
20 7. Bioinformatics Research Centre, Aarhus University, Aarhus, Denmark, 8000  
21 8. Human Genetics Programme, Wellcome Sanger Institute, Wellcome Genome  
22 Campus, Hinxton, CB10 1SA, UK  
23 9. Department of Psychology, University of Cambridge, Cambridge, CB2 3EB, UK

24 Correspondence to Yuanjun Gu ([yg330@cam.ac.uk](mailto:yg330@cam.ac.uk)) or Varun Warriar ([vw260@cam.ac.uk](mailto:vw260@cam.ac.uk))

25 Keywords: Autism, polygenic scores, UK Biobank, ABCD, MRI, neuroimaging genetics

26

27

28

## 29 **Abstract**

30 Genetic variants linked to autism are thought to change cognition and behaviour by altering  
31 the structure and function of the brain. Although a substantial body of literature has identified  
32 structural brain differences in autism, it is unknown whether autism-associated common  
33 genetic variants are linked to changes in cortical macro- and micro-structure. We investigated  
34 this using neuroimaging and genetic data from adults (UK Biobank, N = 31,748) and children  
35 (ABCD, N = 4,928). Using polygenic scores and genetic correlations we observe a robust  
36 negative association between common variants for autism and a magnetic resonance imaging  
37 derived phenotype for neurite density (intracellular volume fraction) in the general  
38 population. This result is consistent across both children and adults, in both the cortex and in  
39 white matter tracts, and confirmed using polygenic scores and genetic correlations. There  
40 were no sex differences in this association. Mendelian randomisation analyses provide no  
41 evidence for a causal relationship between autism and intracellular volume fraction, although  
42 this should be revisited using better powered instruments. Overall, this study provides  
43 evidence for shared common variant genetics between autism and cortical neurite density.

44

## 45 **Introduction**

46 Autism is a highly polygenic, heritable set of neurodevelopmental conditions, characterised  
47 by restrictive repetitive behaviours and unusually narrow interests, sensory hyper- and hypo-  
48 sensitivities, and social-communication difficulties. Twin and familial recurrence studies  
49 indicate that heritability of autism is as high as 60-90% [1, 2], although single nucleotide  
50 polymorphism (SNP) heritability estimates are more modest, ranging from 11 - 50% [3, 4].

51 It is unclear how the polygenic likelihood for autism gives rise to the cognitive and  
52 behavioural outcomes that are collectively referred to as autism. In line with our theoretical  
53 understanding that autism emerges from changes in brain structure and function, genetic  
54 studies have demonstrated an enrichment for autism-related genes and genetic variants in  
55 early neurodevelopmental processes [3, 5–8]. Furthermore, studies have identified differences  
56 in cortical morphology (structural and diffusion phenotypes) and functioning in autistic  
57 compared to non-autistic individuals (e.g., [9–11]) and among autistic individuals (e.g., [12–  
58 17]). Studies have also identified associations between brain morphology and autistic traits in  
59 the general population (e.g., [18, 19]).

60 Previous work has demonstrated that at least a subset of autistic individuals shows  
61 differences in cortical volumes and surface area (SA) during development. For instance,  
62 longitudinal scans of autistic and non-autistic children have identified cortical enlargement in  
63 autistic children after the first year of life [20, 21]. Additionally, common genetic variants  
64 associated with typical differences in surface area and volume are enriched in genes  
65 identified from rare variant studies of neurodevelopmental conditions, including autism [22].

66 However, it is unclear if common and rare genetic variants associated with autism operate  
67 through similar biological and neural mechanisms. For instance, rare genetic variants

68 implicated in autism are also associated with global developmental delay and intellectual  
69 disability [23]. In contrast, common genetic variants associated with autism contribute to  
70 higher cognitive ability [3, 24].

71 A small number of studies have investigated the neural correlates of common genetic variants  
72 associated with autism, indexed by polygenic scores (PGS). These studies demonstrated that  
73 PGS for autism is associated with global and regional alterations in cortical volume, cortical  
74 thickness (CT), and surface area (SA) [18, 25]. Of which, the PGS for autism association  
75 with CT is modified by age [26]. However, these studies were conducted in fewer than 2,500  
76 individuals, which may be underpowered to detect small effect sizes using PGS for autism. A  
77 larger study in the UK Biobank demonstrated that PGS for autism is associated with  
78 multivariate differences in brain asymmetry [27].

79 Currently, there are no large-scale studies that systematically investigate how PGS for autism  
80 is associated with structural and diffusion derived brain imaging measures. We hypothesised  
81 that common genetic variants associated with autism may also be associated with a range of  
82 neuroimaging phenotypes, in both adults and children. In particular, we were interested in the  
83 role of autism-associated common genetic variants in cortical microstructure, given previous  
84 associations between cortical microstructure and genetic variation for schizophrenia and  
85 depression [28–30].

86 In parallel, studies have identified substantial sex differences in both brain structure [31–34]  
87 and the presentation and diagnosis of autism [35, 36]. Notably, even after accounting for  
88 social processes, there still is a male preponderance of autism diagnosis [36], suggesting that  
89 there may be biological factors that contribute to sex differences in autism. For instance, one  
90 study has demonstrated a shift in multivariate neuroanatomical patterns in autistic individuals  
91 towards that typically observed in males [31]. Subsequently, we were also interested in  
92 investigating if sex differences in autism are reflected in the sex differential effects of PGS  
93 for autism on brain structure.

94 Here, we address these questions using the largest homogenous imaging genetics dataset  
95 available from the UK Biobank (N=31,748) and ABCD (N=4,928). We investigated global  
96 and regional association between genetic likelihood for autism and brain structural changes in  
97 the general population, as well as potential sex differences in this association (**Figure 1**). We  
98 studied three macrostructural MRI-derived phenotypes and two microstructure phenotypes  
99 both globally as well as 180, bilaterally averaged cortical regions based on the Glasser  
100 parcellation. We focus on these five phenotypes, as these five are highly correlated with other  
101 cortical phenotypes, index five different latent traits, and have relatively high heritability  
102 compared to several other measurable phenotypes [22]. Follow-up analyses such as genetic  
103 correlation and Mendelian randomisation were conducted to investigate the robustness of the  
104 results and causality, respectively. Finally, to contextualise the results, we also ran  
105 enrichment analyses for the autism PGS association with known functional networks [37] and  
106 cytoarchitectonic classes [38].

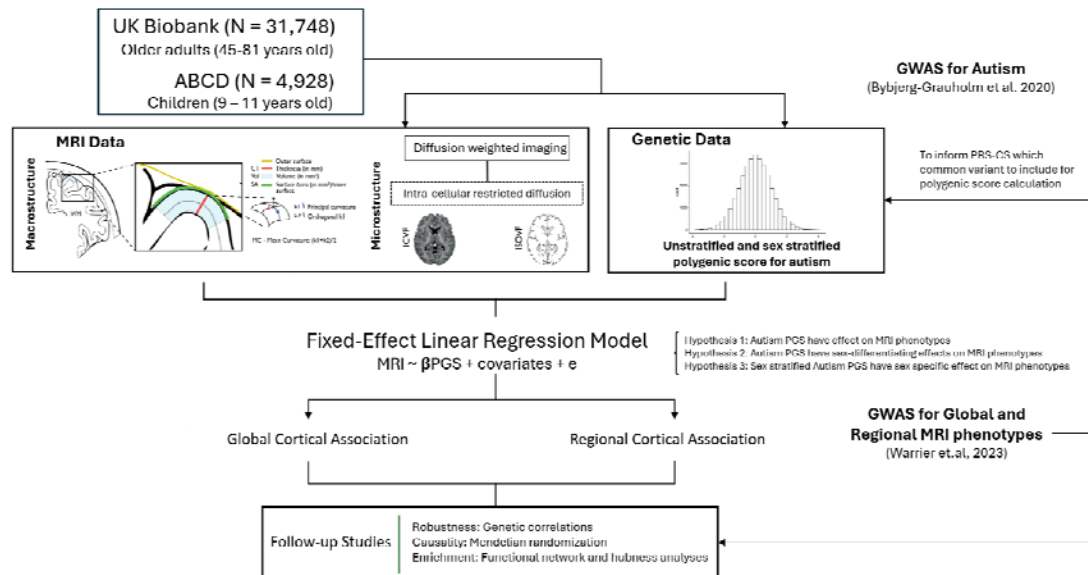

107

108 **Fig. 1: Schematic summary.** We generated polygenic scores for autism in two datasets - UK  
 109 Biobank and ABCD and investigated the associations between the polygenic scores and five  
 110 brain structural phenotypes globally as well as in 180 regions. We fitted sex-stratified and  
 111 unstratified models. We confirmed the robustness of the results using genetic correlations  
 112 and assessed causality using Mendelian randomization. Finally, to contextualise the results,  
 113 we investigated enrichment of the associations in cortical networks.

114

## 115 Methods

### 116 Participants

117 This study is based on data from two independent cohorts, the UK Biobank (UKB) [39] and  
 118 the Adolescent Brain Cognitive Development (ABCD) database [40]. In both cohorts, we  
 119 excluded participants with incomplete MRI and genotype data and focused on participants  
 120 with genetically inferred European ancestry. This generated two subgroups, consisting of N =  
 121 31,748 UKB participants and N = 4,928 ABCD participants. Details of age, sample size, and  
 122 sex are summarised in **Supplementary Table (ST) 1**. Ethical approval was obtained from the  
 123 Human Biology Research Ethics Committee, University of Cambridge (Cambridge, UK).  
 124 Informed consent was provided by all participants.

### 125 Acquisition, preprocessing and quality control for imaging data

126 For MRI data, minimally preprocessed T1 and T2-FLAIR weighted data were downloaded  
 127 from UKB (application 20904) and ABCD through their respective data repository, and  
 128 further processed using FreeSurfer version (Version 6.0.1) ([41]) for cortical reconstruction  
 129 [22].

130 Then, the data was parcellated using the Human Connectome Project parcellation (i.e.  
131 Glasser parcellation) [42] using surface-to-surface mapping to align the diffusion and T1-  
132 weighted imaging. The recon-all reconstruction used both T1- and T2- weighted images  
133 when both were available, and all subsequent statistical analyses included a covariate for the  
134 type of reconstruction (i.e., T1 only or T1-T2 combined). Reconstruction quality was  
135 evaluated using the Euler index [43] and was included as a covariate in subsequent statistical  
136 analyses. Macrostructural MRI-derived phenotypes, including total surface area of the cortex  
137 (SA), average cortical thickness (CT), and total mean curvature (MC) were extracted and  
138 standardised for further analysis.

139 Reconstruction of Neurite orientation dispersion and density imaging (NODDI) was  
140 generated by the Accelerated Microstructure Imaging via Convex Optimization (AMICO)  
141 pipeline [44] and was then aligned to the Glasser parcellation. NODDI can measure three  
142 types of microstructural environment in the human brain. In this study, we used two of them:  
143 a measure of the density neurites including axon and dendrites by measuring the extent of  
144 intracellular diffusion (Intracellular Volume Fraction or ICVF) and a measure of isotropic  
145 volume, typically thought to represent free-water or the cerebrospinal fluid (Isotropic Volume  
146 Fraction or ISOVF). Note ICVF is also called Neurite Density Index (NDI).

147 Global values of the MRI-derived phenotypes were obtained by averaging or summing all  
148 values from the 360 regions. Regional values of MRI-derived phenotypes were bilaterally  
149 averaged, resulting in 180 regional values. Outliers were removed by excluding individuals  
150 with more than 5 standard deviations (SD) or median absolute deviations beyond the mean  
151 and median respectively.

152 In addition, as previously conducted [29], probabilistic tractography was used to calculate  
153 ICVF values at each of 15 major white matter tracts defined using AutoPtx [45].

154

#### 155 Acquisition and quality control for genetic data

156 Details of the genome-wide genotype data used for this study including processing,  
157 imputation, and quality control can be found in detail elsewhere for UKB [46] and ABCD  
158 [22, 47].

159 Briefly, in both datasets, we excluded participants who were not of genetically inferred  
160 European ancestry based on self-reported data and genetic principal component-based  
161 clustering. From the group of included participants, we further excluded individuals with less  
162 than 95% genotyping rate, who had a mismatch between genetic and reported sex, and who  
163 had excess genetic heterozygosity. Additionally, we also excluded any individuals who were  
164 more than  $\pm 5$  standard deviations from the means of the first two genetic principal  
165 components to minimise the impact of fine-scale population stratification on the analyses.

166 In both UKB and ABCD, we included genotyped and imputed SNPs with a minor allele  
167 frequency  $> 0.1\%$ , Hardy-Weinberg equilibrium ( $P > 1 \times 10^{-6}$ ), genotyping rate  $> 95\%$ , and,  
168 for imputed SNPs, imputation quality  $R^2 > 0.4$ .

169

#### 170 Polygenic scores

171 Unstratified and sex-stratified polygenic scores (PGS) for autism were calculated for UKB  
172 and ABCD using PRS-CS [48], based on effect sizes of autosomal SNPs provided by autism  
173 GWAS summary statistics from the iPSYCH cohort [49]. The iPSYCH GWAS consists of  
174 19,870 autistic participants (15,025 males) and 39,078 non-autistic individuals (19,763  
175 males). All PGS were standardised to have a mean of zero and a standard deviation of one.  
176 We used the iPSYCH GWAS compared to the publicly available Grove et al., 2019 GWAS  
177 [3] because the iPSYCH had a larger sample size, better statistical power (mean  $X^2 = 1.23$  for  
178 iPSYCH GWAS and 1.2 for Grove et al., 2019), is unlikely to be affected by participation  
179 bias, and because we had access to sex-stratified GWAS data from the same sample.

180

#### 181 Statistical analyses

182 All statistical analyses between PGS for autism and MRI-derived phenotypes were conducted  
183 in R (Version 4.3.1).

184 We first investigated whether PGS for autism is associated with variation in MRI-derived  
185 global and regional phenotypes (Hypothesis 1, Equations 1 and 2). To identify the effect of  
186 PGS for autism on region-specific effects, global values of MRI-derived phenotypes of  
187 interest were included as covariates in conditional analyses (Equation 3, 5, 7 and 9).

188 Given that the mean scores of the MRI-derived phenotypes differed between sexes (**ST 2**),  
189 for sex differential effects, we investigated if PGS for autism is differentially associated with  
190 variation in MRI-derived phenotypes by sex by including a sex x PGS interaction term into  
191 the model (Hypothesis 2). We tested this across both global and regional phenotypes  
192 (Equations 4 - 5). The genetic correlation between the two sex-stratified autism GWAS,  
193 although high, was significantly less than 1. Given this, we also investigated whether sex-  
194 stratified PGS for autism will have sex-specific effects on MRI-derived phenotypes in males  
195 and females separately both globally and regionally (Hypothesis 3, Equations 6 - 9).

196 For all regressions we included age, age<sup>2</sup>, the first 10 genetic principal components, genotype  
197 sequencing batch, scanning site number, Euler index, framewise displacement [22], and T1-  
198 T2 scan status. These covariates were added to minimise the effect of confounding variables,  
199 based on availability within the cohort database. For Hypothesis 1 we further included sex,  
200 sex x age, and sex x age<sup>2</sup> as covariates.

201 All genetic and imaging data were standardised before and after sex stratification. All  
202 continuous technical covariates, such as Euler Index were also similarly standardised. For all

203 associations with regional MRI-derived phenotypes, the p values were adjusted for multiple  
204 testing for the total number of Glasser parcellation regions for each hemisphere (n = 180)  
205 using Benjamini-Hochberg false discovery rate (FDR) [50]. We used an FDR-corrected p  
206 value  $\leq 0.05$  as the statistical significance threshold.

207

## 208 **Equations underlying the Linear Regression Models:**

209 **Hypothesis 1:** Autism PGS is associated with variations in MRI-derived phenotypes:

210  $Glb.MRI \sim PGS + Sex + Age + Age^2 + Sex:Age + Sex:Age^2 + Technical\ Covariates$

211  $Reg.MRI \sim PGS + Sex + Age + Age^2 + Sex:Age + Sex:Age^2 + Technical\ Covariates$

212  $Reg.MRI \sim PGS + Glb.MRI + Sex + Age + Age^2 + Sex:Age + Sex:Age^2 + Technical\ Covariates$

213 **Hypothesis 2:** Autism PGS has sex-differential association with MRI-derived phenotypes:

214  $Glb.MRI \sim PGS + PGS:Sex + Sex + Age + Age^2 + Sex:Age + Sex:Age^2 + Technical\ Covariates$

215  $Reg.MRI \sim PGS + PGS:Sex + Glb.MRI * + Sex + Age + Age^2 + Sex:Age + Sex:Age^2 +$

216  $Technical\ Covariates$

217 **Hypothesis 3:** Sex stratified autism PGS have sex-specific associations with MRI-derived  
218 phenotypes:

219  $f.Glb.MRI \sim fPGS + Age + Age^2 + Technical\ Covariates$

220  $f.Reg.MRI \sim fPGS + f.Glb.MRI * + Age + Age^2 + Technical\ Covariates$

221  $m.Glb.MRI \sim mPGS + Age + Age^2 + Technical\ Covariates$

222  $m.Reg.MRI \sim mPGS + m.Glb.MRI * + Age + Age^2 + Technical\ Covariates$

223 Note: MRI indicates the MRI-derived phenotype of interest. Prefix Glb. indicates global  
224 MRI-derived phenotype value; prefix Reg. indicates Regional MRI-derived phenotype; prefix  
225 f. indicates female-stratified values; prefix m. indicates male-stratified values. For equations  
226 5, 7 and 9, we ran separately with and without the global MRI-derived phenotypes as  
227 covariates. This is indicated by Glb.MRI\*.

228

229 Bidirectional Mendelian randomization analyses and genetic correlations

230 We investigated the causal relationship between autism and the global and regional imaging  
231 phenotypes using two-sample bidirectional Mendelian randomization (MR) analyses, using  
232 the ‘TwoSampleMR’ (Version 0.5.7) and ‘MRPRESSO’ (Version 1.0) packages in R.  
233 Specifically, we were interested in understanding if (i) autism (exposure) causes changes in  
234 brain structure indexed by MRI-derived phenotypes (outcome) and/or (ii) changes in brain  
235 structure indexed by MRI-derived phenotypes (outcome) causes autism (outcome). For  
236 autism, we used SNPs from the unstratified autism GWAS from iPSYCH. For MRI-derived  
237 phenotypes, we used the meta-analysed GWAS of ABCD and UKB [22]. For all GWAS of  
238 exposure phenotype, we included only SNP genetic instruments that reached genome-wide  
239 significance ( $p < 5 \times 10^{-8}$ ), after clumping at 10,000 kb distance and an LD  $r^2$  of 0.001.

240 We fitted different MR models, including inverse variance weighted (IVW) MR, median  
241 weighted (majority valid), MR Egger (accounts for pleiotropy,) and MR PRESSO (detects  
242 and excludes outliers in the instrument) to test the robustness of the results. We conducted  
243 further sensitivity analyses, such as testing for heterogeneity and horizontal pleiotropy, and  
244 leave-one-out to interrogate the validity of the results.

245 Genetic correlations between autism and global and regional MRI-derived phenotypes were  
246 estimated through LDSC (Version 1.0.1) [51], using Autism GWAS summary statistics from  
247 the iPSYCH cohort [49] and meta-analysed GWAS summary statistics of each MRI-derived  
248 phenotypes from the combined ABCD and UKB cohorts [22]. The LD score used is provided  
249 by the North-West European population from the 1000 Genomes project [52]. For genetic  
250 correlation between autism and regional MRI-derived phenotypes, only regions that have  
251 shown significant association in equation 2 are included in the analysis.

252 All results were corrected for multiple corrections using Benjamini Hochberg False  
253 Discovery Rate (FDR) corrected p value  $\leq 0.05$ .

254

#### 255 Network and enrichment analyses

256 We ran a series of investigations to understand the links between brain networks and PGS for  
257 autism. Conceptualising the brain as a connected network, we generated hubness scores for  
258 each region by calculating both mean phenotypic (structural connectivity hubness) and  
259 genetic (genetic hubness) correlation between each cortical region and every other cortical  
260 region. Structural connectivity hubs were calculated using phenotypic data separately in the  
261 UKB and ABCD. For genetic hubness we used the genetic correlation values from the meta-  
262 analysed GWAS of ABCD and UK Biobank [22]. We investigated the correlation between  
263 hubness scores and PGS association across regions.

264 We further investigated if the association of PGS with the regional phenotypes were enriched  
265 in cortical networks identified from intrinsic functional connectivity (Yeo-Kreinen networks  
266 [37]) and cytoarchitectonic classes (Mesulam classes [38]). Enrichment analyses were  
267 conducted using 1,000 “spin” permutation testing [53], which accounts for the spatial  
268 autocorrelation among regions. Results were FDR-corrected for each MRI-derived phenotype  
269 and cortical atlas.

270

#### 271 Sex-stratified GWAS of global imaging phenotypes

272 To investigate potential sex differences, we conducted GWAS of global SA, CT, MC, ICVF  
273 and ISOVF in the UK Biobank separately in males (N = 14,957) and females (N = 16,833).  
274 We followed the same pipeline as used before [22] and genetic quality control is detailed  
275 earlier in the section “Acquisition and quality control of genetic data”. All phenotypes were  
276 standardised, and we included the same covariates included in the PGS analyses to test



277 Hypothesis 1. GWAS was conducted using fastGWA [54] which uses a linear mixed effects  
278 model to account for fine-scale population stratification and relatedness among participants.  
279 We used the sex-stratified GWAS for genetic correlation analyses with the sex-stratified  
280 autism GWAS to investigate sex-specific effects.

281 Data availability

282 This study used imaging, genetic and demographic data collected from the UK Biobank  
283 Resource under application number 20904, and ABCD. Data are available by request to  
284 registered and approved researchers on their corresponding platforms.

285 GWAS summary statistics and cortical morphology data are available through request from  
286 the CAM:IDE Data Access Portal (<https://portal.ide-cam.org.uk/overview/483>)[22].  
287 iPSYCH-based GWAS data for autism [49] can be requested from Jakob Grove and Anders  
288 Børghlum.

289

290 Code availability

291 All analyses were written in R (Version 4.3.1). Mendelian Randomisation was performed  
292 using R package TwoSampleMR [55, 56] (<https://mrcieu.github.io/TwoSampleMR/>) and  
293 MRPRESSO [57] (<https://github.com/rondolab/MR-PRESSO>).

294 The pipelines used to generate processed MRI-derived phenotypes are available through  
295 GitHub (UKB, <https://github.com/ucam-department-of-psychiatry/UKB>; ABCD,  
296 <https://github.com/ucam-department-of-psychiatry/ABCD>). PGS was generated using the code  
297 provided by PRSCs using “--phi 1e-2”: <https://github.com/getian107/PRSCs>. Genetic  
298 correlations were conducted in line with the code provided by the software developers:  
299 <https://github.com/bulik/ldsc>. Details of how glasser regions were mapped onto the networks  
300 are provided here: [https://github.com/ucam-department-of-psychiatry/maps\\_and\\_parcs](https://github.com/ucam-department-of-psychiatry/maps_and_parcs).

301 All other codes used for this study are available at <https://github.com/yg330/autism.img-pgs>.

302

## 303 Results

304 Autism polygenic scores are associated with reduced global cortical ICVF

305 We first investigated the association between PGS for autism and five global (standardised  
306 summed or averaged) structural or diffusion MRI-derived phenotypes in both the UK  
307 Biobank and ABCD. These include surface area (SA), cortical thickness (CT), mean  
308 curvature (MC), Intracellular Volume Fraction (ICVF, also called Neurite Density Index or  
309 NDI), and Isotropic Volume Fraction (ISOVF). We chose these five phenotypes as they are  
310 highly correlated with other structural and diffusion phenotypes representing five cortical  
311 latent traits, have low correlations between each other, and have higher SNP heritability  
312 compared to other highly correlated phenotypes [22]. In the UKB, PGS for autism was

313 significantly associated with lower SA (Incremental variance explained i.e., Inc  $R^2$ : 1.23e-04)  
 314 and ICVF (Inc  $R^2$ : 1.23e-04), and increased CT (Inc  $R^2$ : 2.10e-04) after FDR correction  
 315 (**Figure 2A** and **ST 3**). In the younger ABCD cohort, higher PGS for autism was nominally  
 316 significantly associated with lower ICVF (Inc  $R^2$ : 7.31e-04) and significantly with higher  
 317 ISOVF (Inc  $R^2$ : 1.26e-03) (**ST 3**). We further confirmed the robustness of these observations  
 318 through genetic correlation, where we observed a significant negative genetic correlation  
 319 between ICVF and autism ( $r_g = -0.22$ , s.e.m = 0.07,  $p = 1.80e-3$ ) (**Figure 2B** and **ST 4**).

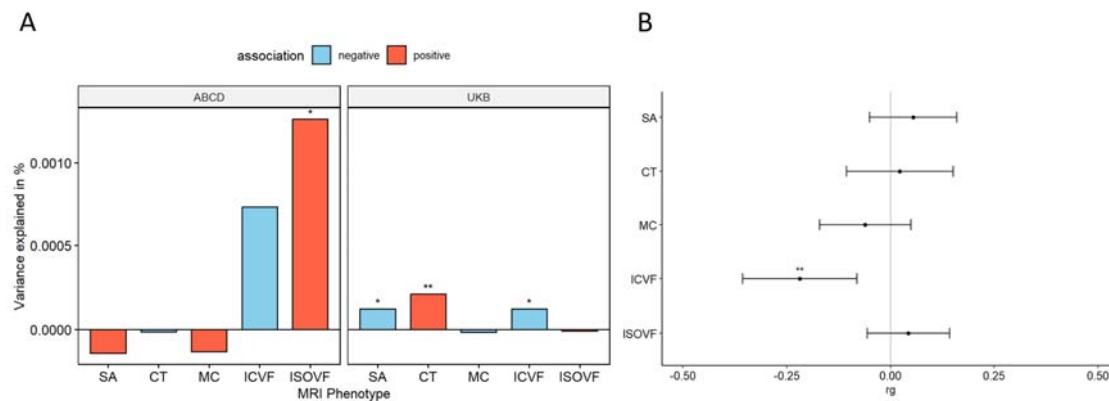

320 **Fig 2. Statistical and Genetic correlation between polygenic scores for autism and global**  
 321 **MRI-derived phenotypes.**

322 **A** Percentage of variance explained by polygenic score for autism (PGS) for different global  
 323 cortical MRI-derived phenotypes under cohorts. SA surface area, CT cortical thickness, MC  
 324 mean curvature, ICVF intracellular volume fraction or neurite density index, ISOVF  
 325 isotropic volume fraction. Blue bar indicates negative associations, and the red bar indicates  
 326 positive associations. \*  $p \leq 0.05$ , \*\*  $p \leq 0.01$ . **B** Genetic correlation ( $r_g$ ) between autism  
 327 and MRI-derived phenotype GWAS. Whiskers indicate 95% confidence intervals. Asterisks  
 328 indicate  $p$  values after  $FDR < 5\%$  correction, with code sign the same as **A**.  
 329

330

331 PGS for autism are negatively associated with regional cortical ICVF

332 We next investigated whether PGS for autism are associated with regional variation in the  
 333 same five MRI-derived phenotypes. In the UKB, we identified a negative association  
 334 between PGS for autism and ICVF in nine regions (Inc. $R^2$ : 2.25e-4 to 5.72e-4) and with SA  
 335 in 24 regions (Inc. $R^2$ : 1.53e-4 to 3.60e-4) after FDR correction (**Figure 3A**). We did not  
 336 identify a significant association with any other regional phenotypes (**ST 5**).

337 In ABCD, despite the smaller sample size, ICVF was significantly negatively associated with  
 338 PGS for autism in eight regions (Inc. $R^2$ : 1.64e-3 to 2.11e-3) (**Figure 3B**), although these  
 339 regions differed from the significantly associated regions in the UKB (**ST 6**). In the UKB, the  
 340 significant associations with ICVF were primarily in the frontal and temporal lobes whereas  
 341 in ABCD, the significant associations were in the occipital lobe. In addition, PGS for autism

342 was positively associated with MC (Inc.R<sup>2</sup>: 3.20e-3) in the lateral temporal region, and  
 343 ISOVF in five regions (Inc.R<sup>2</sup>: 1.96e-3 to 2.36e-3).

344 Supporting the robustness of the associations with ICVF, autism had significant and negative  
 345 genetic correlations with ICVF in 15 of the 17 regions that were significantly associated with  
 346 autism PGS (ST 4 and Figure 3C). In contrast, we did not identify any significant  
 347 associations between autism and SA, MC and ISOVF. Together, these analyses identify  
 348 robust shared genetics between autism and ICVF using two different methods and in two  
 349 different cohorts.

350 To account for the effect of the global phenotypes, we re-ran the analyses after correcting for  
 351 the global phenotypes. In these conditional analyses, ICVF in one region, STSda (Inc.R<sup>2</sup>:  
 352 2.26e-4) located in the superior temporal gyrus, and MC in TE2P, located in the fusiform  
 353 gyrus (Inc.R<sup>2</sup>: 3.19e-3), remained significantly associated with PGS for autism. We  
 354 additionally found one region in CT named DVT, located in the posterior cingulate, which  
 355 showed a significant association with PGS in autism (ST 7 and ST 8).

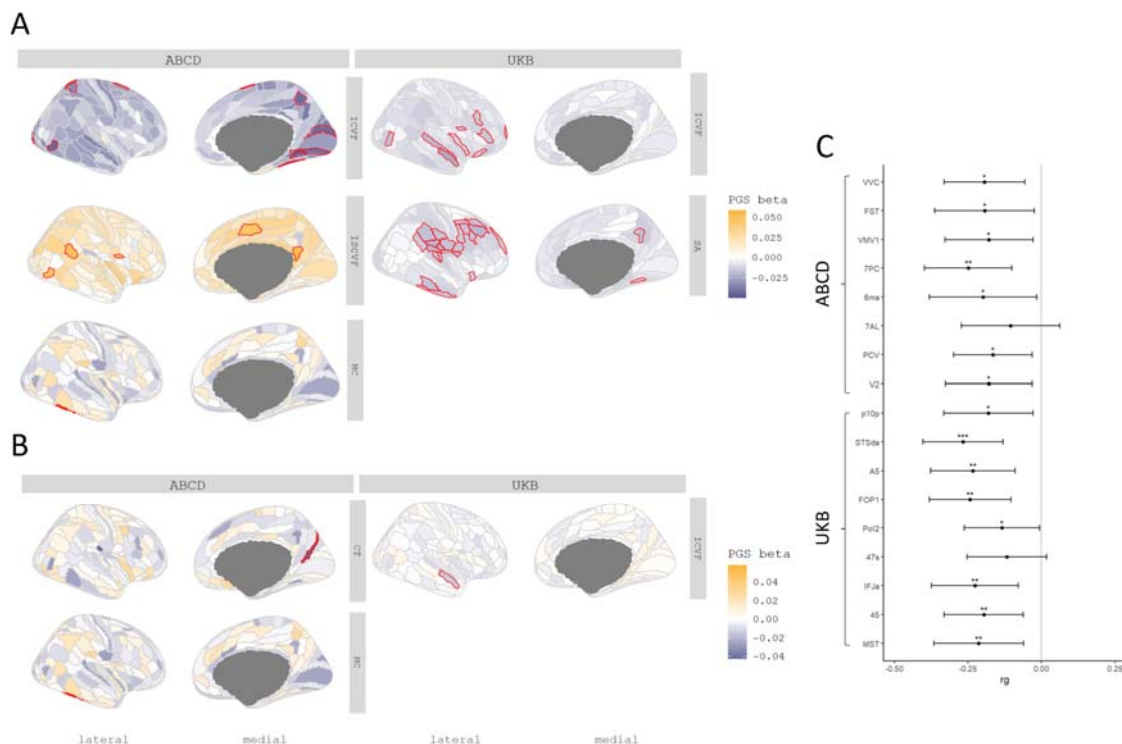

356  
 357 **Figure 3. Statistical and Genetic correlation between polygenic scores for autism and**  
 358 **regional MRI-derived phenotypes.** *A* Cortical map of regional associations between PGS  
 359 for autism and cortical MRI-derived phenotypes. Red outline means the effect of PGS for  
 360 autism reached statistical significance at  $FDR \leq 0.05$ . *B* Cortical map of regional  
 361 associations between PGS for autism and cortical MRI-derived phenotypes after global  
 362 phenotype correction. Red outline means the effect of PGS for autism reached statistical  
 363 significance at  $FDR \leq 0.05$ . For brevity, we have displayed only regional association maps  
 364 for phenotypes where there was at least one significant regional association. *C* Genetic

365 correlation between autism and regional ICVF in regions with statistically significant  
366 associations with the PGS for autism. Asterisks indicate  $p$  values after FDR correction: \*  $p$   
367  $\leq 0.05$ , \*\*  $p \leq 0.01$ , \*\*\*  $p \leq 0.001$ .

368

369 Autism PGS is more negatively associated with ICVF in cortical hubs.

370 We recognise that cortical regions are not truly independent but may be organised as  
371 networks based on structural or genetic similarity, or functional co-activation [37], or cellular  
372 similarity [38]. For example, CT in regions that co-vary or are connected with several other  
373 regions (termed hubs) were more likely to be altered in autism [58]. Investigating this  
374 hypothesis, we observe a significant correlation between genetic hubness and PGS  
375 association with autism for ICVF in both the UKB and ABCD, and CT in ABCD (**ST 9**,  
376 **Figure 4**). Further supporting this, and in line with Cheverud's conjecture, we identified a  
377 significant correlation between structural connectivity and PGS association for ICVF in both  
378 ABCD and UKB. We also identified a significant association between structural connectivity  
379 and autism PGS association with CT in the ABCD and ISOVF in the UKB.

380 In addition to the significant association between hubness and ICVF, regions with statistically  
381 significant associations with autism PGS also on average had higher hubness (**Figure 4**,  
382 **Supplementary Figures 1 and 2**). We further considered if there is an association of the  
383 PGS effects in known functional networks (Yeo) or cytoarchitectural classes of the cortex  
384 (Mesulam). After spin permutation correction, PGS associations for MC were enriched in the  
385 idiopathic cortex (Mesulam class) in both ABCD and UKB (**ST 10**). We did not identify any  
386 other robust enrichments across both ABCD and UKB.

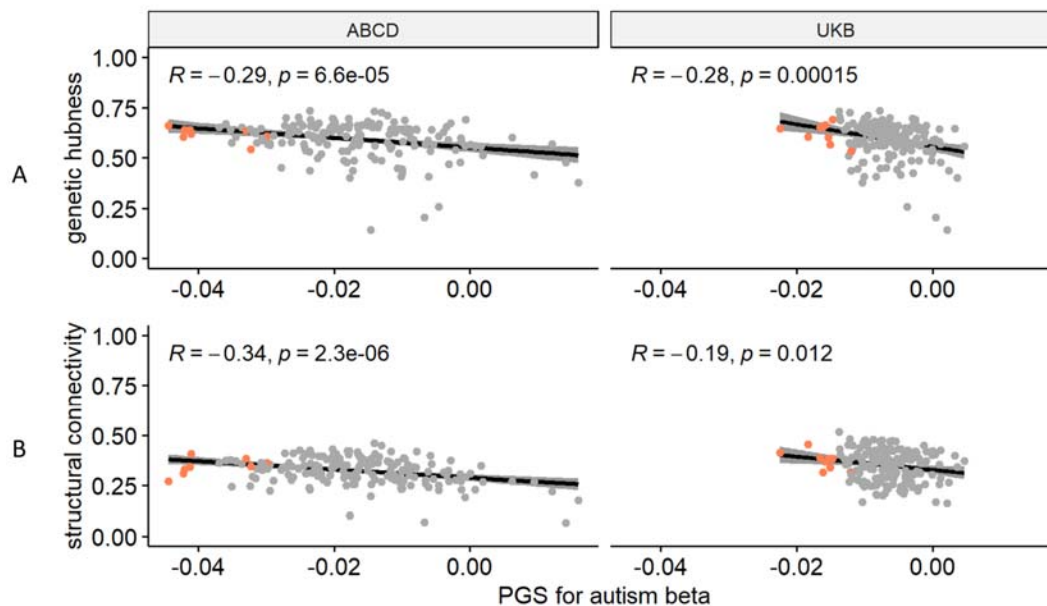

387

388 **Fig 4. Enrichment Analysis: A** Correlation plot between genetic hubness and autism PGS  
389 association with ICVF in the ABCD and UK Biobank cohorts. **B** Correlation plot between

390 structural connectivity and autism PGS association with ICVF in the ABCD and UK Biobank  
 391 cohorts. Each point represents a region and regions where there is a significant association  
 392 between the phenotype and autism PGS are coloured in red.  $R$  is the Pearson correlation  
 393 coefficient.  $p$  is the  $p$  value before correction for multiple testing, all  $p$ -value remained  
 394 significant ( $<0.05$ ) after FDR correction.

395

396 PGS for autism are negatively associated with ICVF in white matter tracts.

397 As PGS for autism consistently showed significant negative associations with cortical ICVF,  
 398 we were interested in investigating if similar effects would be observed for 27 white matter  
 399 tracts. We investigated this only in the UKB due to data availability. PGS for autism was  
 400 significantly negatively associated with ICVF in 22 out of 27 ICVF white matter tracts (Inc  
 401  $R^2$  from  $-1.77e-05$  to  $2.15e-04$ ) (ST 11 and Figure 5). The variance in white matter tracts  
 402 ICVF explained by the autism PGS was similar to that of regional cortical ICVF in the UKB.  
 403 However, in contrast to associations with cortical ICVF, we did not observe significant  
 404 genetic correlations between autism and ICVF in white matter tracts (ST 4).

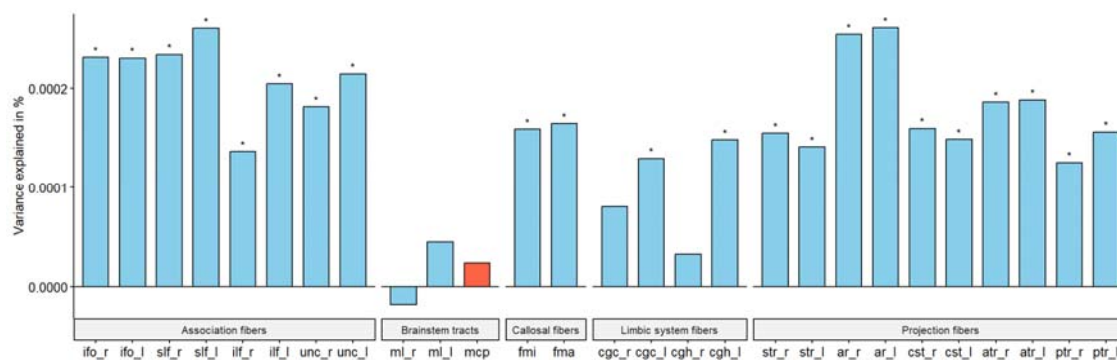

405

406 **Fig 5. White tract association.** Percentage of variance explained by polygenic score for  
 407 autism (PGS) for 15 major white matter tracts for ICVF in UKB. Blue bar indicates negative  
 408 associations, and the red bar indicates positive associations. \*  $p \leq 0.05$ . The acronyms for  
 409 the 15 major white matter tracts are mcp = middle cerebellar peduncle, ml = medial  
 410 lemniscus, cst = corticospinal tract, ar = acoustic radiation, atr = anterior thalamic  
 411 radiation, str = superior thalamic radiation, ptr = posterior thalamic radiation, slf =  
 412 superior longitudinal fasciculus, ilf = inferior longitudinal fasciculus, ifo = inferior fronto-  
 413 occipital fasciculus, unc = uncinata fasciculus, cgc = cingulate gyrus part of cingulum, cgh =  
 414 parahippocampal part of cingulum, fmi = forceps minor, and fma = forceps major. Suffix  $_r$   
 415 means it is estimated from the right hemisphere and  $_l$  means it is estimated from the left  
 416 hemisphere.

417

418 No evidence for causal relationships between autism and MRI-derived phenotypes

419 Since there were significant genetic correlations between PGS for autism and global and  
420 regional MRI-derived phenotypes, we additionally investigated whether there is a casual  
421 relationship between autism and these MRI-derived phenotypes using four different  
422 Mendelian randomisation methods. Specifically, we focussed on the phenotypes (global and  
423 regional) where we observed a significant association with PGS, hypothesising that causal  
424 relationships will lead to shared genetics. Additionally, for regional phenotypes, we excluded  
425 any phenotype with fewer than three genome-wide significant SNPs after harmonisation.

426 For global MRI-derived phenotypes, after adjusting for multiple correction based on MRI-  
427 derived phenotype tested, we found no significant evidence for causal effect of MRI-derived  
428 phenotypes on autism, nor causal effect of autism on MRI-derived phenotypes across four  
429 MR methods tested (**ST 12** and **13**). Similar results were also seen for autism and regional  
430 MRI-derived phenotypes after multiple testing corrections (**ST 14** and **15**).

431 Limited evidence for sex differential effects of autism PGS on brain structure

432 Given that more males are diagnosed as autistic compared to females, we investigated if  
433 some of the sex differences in both the manifestation and diagnosis of autism are attributable  
434 to sex-differential effects in the cortex. The sex-stratified GWAS of autism from iPSYCH  
435 had high genetic correlation ( $r_g = 0.80$ ,  $s.e.m = 0.08$ ,  $p = 2.22e-20$ ), suggesting that the  
436 common variant effects for autism are largely similar between sexes.

437 We first investigated if the effects of autism PGS on MRI-derived phenotypes are statistically  
438 different between sexes by including a PGS x sex interaction term. For the global phenotypes,  
439 we found a significant sex by PGS interaction for ISOVF in UKB (**ST 3**), but this was not  
440 significant in ABCD (**ST 3**) nor generalisable to regional ISOVF phenotypes (**ST 16** and **ST**  
441 **17**). In ABCD, we found regional sex differential associations for CT in three regions only  
442 after global phenotype correction, although this was not significant in the UKB (**ST 18** and  
443 **ST 19**). Overall, we did not find robust evidence to suggest sex differential effects of the  
444 autism PGS on cortical MRI-derived phenotypes.

445 The GWAS for autism in males and females showed high correlation ( $r_g = 0.80$ ,  $s.e.m = 0.08$ ,  
446  $p = 2.22e-20$ ), but the correlation was still significantly less than 1. This suggests the  
447 possibility of sex-specific genetic influences on autism. To further investigate potential sex  
448 differences, we used the sex-stratified autism GWAS to generate sex-specific polygenic risk  
449 scores for autism. We then examined the effects of these sex-specific scores in individuals of  
450 the same sex in the UK Biobank and ABCD globally (**ST 3**) and regionally (**ST 20** to **ST 27**).  
451 In UKB, we did not observe any sex-specific effect of PGS for autism. In ABCD, we  
452 observed significant male-specific autism PGS effects on ICVF and ISOVF in males (**ST 3**).  
453 Regionally, we found no male-specific, nor female-specific associations in UKB. In ABCD,  
454 we found male-specific regional effects for ICVF in one region (PCV in the precuneus) and  
455 ISOVF in nine regions. Additionally, after global phenotype correction, we identified male-  
456 specific regional effects for ISOVF in three regions. We did not find any significant genetic

457 correlation between the sex-stratified autism GWAS and sex-stratified global MRI-derived  
 458 phenotypes after multiple testing correction (ST 4).

459

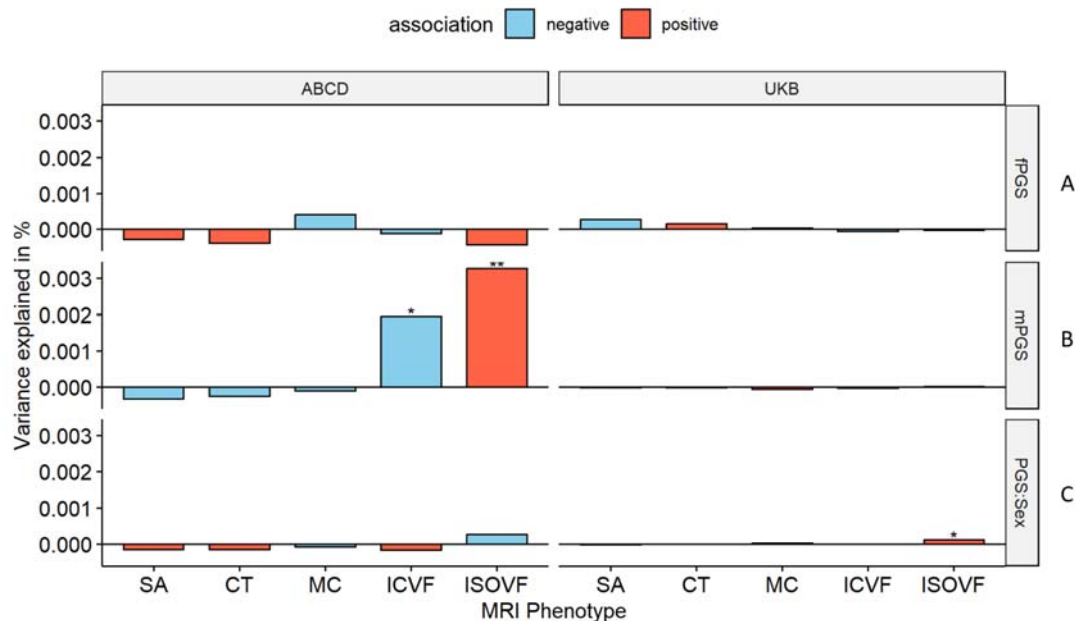

460

461 **Figure 6: Percentage of variance explained by sex-specific and sex-differentiating PGS**  
 462 **for autism. A and B** Percentage of variance explained by sex stratified autism PGS for the  
 463 global phenotypes in the equivalent sexes in ABCD and UKB. **C** Percentage variance  
 464 explained by the sex interaction analysis. Asterisks indicate *P* values after FDR correction: \*  
 465 *P* <= 0.05, \*\* *P* <= 0.01. mPGS = polygenic scores from the males-only GWAS, fPGS =  
 466 polygenic scores from the females-only GWAS, and PGS:Sex = the interaction between sex  
 467 and PGS. SA = surface area; CT = cortical thickness, MC = mean curvature, ICVF =  
 468 intracellular volume fraction.

## 469 Discussion

470 There has been a longstanding interest in how the genetic likelihood for autism manifests in  
 471 the brain. Here, we investigate this by interrogating the correlates of common genetic variants  
 472 for autism and MRI-derived brain phenotypes. In the largest sample to date, we  
 473 systematically investigate the relationship between PGS for autism and MRI-derived  
 474 phenotypes, beyond CT and SA [18, 26], and also investigate how sex and sex differences  
 475 modify these relationships.

476 We found widespread negative associations between PGS for autism and ICVF, a measure of  
 477 neurite density. ICVF, measured using the NODDI orientation sequence, is thought to be a  
 478 measure of the density of neurites (axons and dendrites) in the brain, which has been  
 479 supported by histological studies in humans [59] and mice [60]. This association was  
 480 observed in both adults and children and validated using two different methods: polygenic

481 scores and genetic correlations. This age-invariant association is noteworthy as neurite  
482 density changes non-linearly with age: it increases rapidly during childhood and decreases in  
483 later adulthood [61, 62]. One explanation of this robust association across ages is that the  
484 genetic likelihood for autism, alters the development of neurite density across development.  
485 Although Mendelian Randomisation did not identify a causal relationship, this could be due  
486 to the reduced statistical power of the instruments used. This association between autism and  
487 reduced neurite density is supported by previous case-control imaging studies [63–65] and  
488 mice studies focusing on autism-associated genes [66, 67]. These findings are paralleled by  
489 early postmortem brain studies in autism, which have identified cortical disorganisation [68]  
490 and reduced mini-columns in autism [69]. However, these findings have typically been  
491 conducted in small cohorts, and have not been consistently replicated. Furthermore, it is  
492 difficult to map microscale changes in neural cytoarchitecture, identified from postmortem  
493 studies, to relatively gross changes captured by MRI.

494 The association with reduced ICVF, at least globally, is not specific to autism, but also  
495 associated with many other traits and conditions, such as sleep, seizure, psychosis,  
496 schizophrenia, and Parkinson's disease [29, 70, 71]. For instance, previous work has  
497 identified that PGS for schizophrenia is associated with reduction in global and regional  
498 ICVF [29]. However, the effects of the autism PGS on ICVF were only modestly correlated  
499 with the effects of schizophrenia PGS on ICVF ( $r = 0.33$ , 95% CI = 0.19 - 0.45), suggesting  
500 that although both autism and schizophrenia PGS are associated with reduction in ICVF, their  
501 effects vary. Notably, this is in line with the genetic correlation between autism and  
502 schizophrenia. It is unclear if reduction in ICVF is a transdiagnostic marker of  
503 neurodevelopmental and mental health conditions, or a marker of a co-occurring condition  
504 that is shared between autism and schizophrenia, for example, depression and anxiety.

505 The association with ICVF was widespread across the cortex and differed regionally between  
506 ABCD and the UKB. This may reflect age related changes in ICVF, age related genetic  
507 effects, or simply heterogeneity between cohorts. However, in both cohorts, for ICVF there  
508 was a strong correlation between hubness and the magnitude of association with autism PGS.  
509 One plausible explanation for this is the shared genetics between intracortical connectivity  
510 and autism. In other words, the same underlying mechanism that results in greater  
511 connectivity among regions may also contribute to variation in autistic traits. Similar findings  
512 have also been observed with schizophrenia [30, 72], suggesting broader shared genetics  
513 between determinants of hubness and neurodevelopmental and psychiatric outcomes.

514 In addition to ICVF, this study has also found significant global associations between PGS  
515 for autism, CT and SA in the adult study cohort, but not in the ABCD, possibly because of  
516 relatively small sample sizes leading to low statistical power to detect small effects. Large-  
517 scale case-control neuroimaging studies and meta-analysis have identified increased global  
518 CT and grey matter volume in autism [9, 11]. For regional phenotypes, beyond ICVF, this  
519 study observed significant associations between PGS for autism and SA for adults,  
520 associations between PGS for autism and MC for children. The lack of consistent findings  
521 across cohorts suggests that other factors, such as age difference between cohorts might also



522 modify the association between autism and brain structure. The validity of these findings will  
523 require further testing using additional datasets and methods. Additionally, we also did not  
524 replicate previous regional findings in CT [26], potentially due to methodological differences  
525 or due to regression towards the mean.

526 The lack of consistent association between PGS for autism and SA, a measure of cortical  
527 expansion, is noteworthy. Previous research from our group has demonstrated an enrichment  
528 of polygenic signals for SA in or near genes associated with neurodevelopmental conditions  
529 (including autism) from studies of *de novo* and rare variants [22]. Furthermore, both  
530 neurodevelopmental genes and common genetic variants for SA are enriched for neural  
531 progenitor cells [22]. Neither of these observations are true for ICVF. Although both  
532 common and rare genetic variants are associated with autism, questions still remain if these  
533 two broad classes of variants lead to the same phenotype in the brain [23, 25] and are  
534 enriched in the same biological processes [73]. The differential overlap between rare-genetic  
535 variants and common genetic variants for autism with SA and ICVF respectively, suggests,  
536 partly different neurological effects.

537 For sex differences, we observed some sex-specific global associations between sex-stratified  
538 PGS and MRI-derived phenotype in sex-stratified sample populations, but no association was  
539 observed for regional phenotypes. Furthermore, we did not have any robust evidence to  
540 believe that the effect of PGS for autism on structural brain phenotypes, either globally or  
541 regionally differs by sex. The current results provide no evidence to suggest that sex  
542 differences in autism diagnosis and presentation emerge from sex differences in brain  
543 structure. However, we note that the sex-stratified GWAs were not particularly well powered,  
544 and that the sex-stratified analyses were conducted using smaller sample sizes compared to  
545 the unstratified analysis.

546 Despite the large sample size, our study has a few limitations. First, we focussed only on  
547 individuals of genetically inferred European ancestries given both the relatively small number  
548 of individuals of other ancestries with neuroimaging and genetic data, and the poor portability  
549 of polygenic scores across genetically inferred ancestries [74]. However, we have no reason  
550 to believe that these results will be discrepant in other genetically inferred ancestry groups.  
551 Second, our study does not interrogate how heterogeneity within autism [23] may contribute  
552 to differences in results. Third, the current polygenic scores for autism capture only between  
553 1 - 2% of the total variance for autism [3, 23]. However significant findings from polygenic  
554 scores have been corroborated using genetic correlations, which accounts for a larger fraction  
555 of the variance in autism likelihood.

556 In conclusion, we find robust evidence to suggest that common variants that increase the  
557 likelihood for autism are associated with decreased neurite density index. This supports  
558 similar findings from smaller-scale neuroimaging, animal and postmortem research.  
559 However, this association with neurite density is not specific to autism, and future research  
560 needs to investigate whether reduced neurite density is a transdiagnostic marker for  
561 neurodevelopmental and mental health conditions.

562

### 563 **Acknowledgements**

564 This research was supported by funding from the Simons Foundation for Autism Research  
565 Initiative, the Wellcome Trust (214322\Z\18\Z), Horizon-Europe R2D2-MH (grant  
566 agreement number 101057385), and UKRI (10063472). For the purpose of open access, we  
567 have applied a CC BY public copyright licence to any author-accepted manuscript version  
568 arising from this submission. S.B.-C. also received funding from the Autism Centre of  
569 Excellence, the Templeton World Charitable Fund, the MRC and the National Institute for  
570 Health Research Cambridge Biomedical Research Centre. The research was supported by the  
571 National Institute for Health Research Applied Research Collaboration East of England. Any  
572 views expressed are those of the author(s) and not necessarily those of the funder. Some of  
573 the results leading to this publication have received funding from the Innovative Medicines  
574 Initiative 2 Joint Undertaking under grant agreement no. 777394 for the project AIMS-2-  
575 TRIALS. This joint undertaking receives support from the European Union's Horizon 2020  
576 research and innovation program and the EFPIA and Autism Speaks, Autistica and the  
577 SFARI. The iPSYCH team was supported by grants from the Lundbeck Foundation (R102-  
578 A9118, R155-2014-1724 and R248-2017-2003), the NIMH (1R01MH124851-01 to A.D.B.),  
579 and EU's Horizon Europe program (R2D2-MH; grant agreement no. 101057385 to A.D.B.).  
580 The Danish National Biobank resource was supported by the Novo Nordisk Foundation.  
581 High-performance computer capacity for handling and statistical analysis of iPSYCH data on  
582 the GenomeDK HPC facility was provided by the Center for Genomics and Personalized  
583 Medicine and the Centre for Integrative Sequencing, iSEQ, Aarhus University, Denmark  
584 (grant to A.D.B.).

### 585 **Ethics declarations**

586 The authors declare no competing interests.

587

### 588 **APEX Consortium**

589 Deep Adhya, Carrie Allison, Bonnie Ayeung, Rosie Bamford, Simon Baron-Cohen, Richard  
590 Bethlehem, Tal Biron-Shental, Graham Burton, Wendy Cowell, Jonathan Davies, Joanna  
591 Davis, Dori Floris, Alice Franklin, Lidia Gabis, Daniel Geschwind, David M. Greenberg,  
592 Yuanjun Gu, Alexandra Havdahl, Alexander Heazell, Rosemary Holt, Matthew Hurles,  
593 Yumnah Khan, Meng-Chuan Lai, Madeline Lancaster, Michael Lombardo, Hilary Martin,  
594 Jose Gonzalez Martinez, Jonathan Mill, Mahmoud Musa, Kathy Niakan, Adam Pavlinek,  
595 Lucia Dutan Polit, Marcin Radecki, David Rowitch, Jenifer Sakai, Laura Sichlinger, Deepak  
596 Srivastava, Alexandros Tsompanidis, Florina Uzefovsky, Varun Warriar, Elizabeth Weir,  
597 Xinhe Zhang.

598

### 599 **iPSYCH Autism working group**

600 Anders Borglum, Jonas Bybjerg-Grauholm, Jakob Grove, David M. Hougaard, Ole Mors,  
601 Preben Bo Mortensen, Merete Nordentoft and Thomas Werge.

602

603

604

## 605 **References**

- 606 1. Tick B, Bolton P, Happé F, Rutter M, Rijdsdijk F. Heritability of autism spectrum  
607 disorders: a meta-analysis of twin studies. *J Child Psychol Psychiatry*. 2016;57:585–595.
- 608 2. Bai D, Yip BHK, Windham GC, Sourander A, Francis R, Yoffe R, et al. Association of  
609 Genetic and Environmental Factors With Autism in a 5-Country Cohort. *JAMA*  
610 *Psychiatry*. 2019;76:1035–1043.
- 611 3. Grove J, Ripke S, Als TD, Mattheisen M, Walters RK, Won H, et al. Identification of  
612 common genetic risk variants for autism spectrum disorder. *Nat Genet*. 2019;51:431–  
613 444.
- 614 4. Gaugler T, Klei LL, Sanders SJ, Bodea CA, Goldberg AP, Lee AB, et al. Most genetic  
615 risk for autism resides with common variation. *Nat Genet*. 2014;46:881–885.
- 616 5. Parikshak NN, Swarup V, Belgard TG, Irimia M, Ramaswami G, Gandal MJ, et al.  
617 Genome-wide changes in lncRNA, splicing, and regional gene expression patterns in  
618 autism. *Nature*. 2016;540:423–427.
- 619 6. Satterstrom FK, Kosmicki JA, Wang J, Breen MS, De Rubeis S, An J-Y, et al. Large-  
620 Scale Exome Sequencing Study Implicates Both Developmental and Functional  
621 Changes in the Neurobiology of Autism. *Cell*. 2020;180:568–584.e23.
- 622 7. Romero-Garcia R, Warriier V, Bullmore ET, Baron-Cohen S, Bethlehem RAI. Synaptic  
623 and transcriptionally downregulated genes are associated with cortical thickness  
624 differences in autism. *Mol Psychiatry*. 2018. 2018. [https://doi.org/10.1038/s41380-018-](https://doi.org/10.1038/s41380-018-0023-7)  
625 0023-7.
- 626 8. Gandal MJ, Haney JR, Wamsley B, Yap CX, Parhami S, Emani PS, et al. Broad  
627 transcriptomic dysregulation occurs across the cerebral cortex in ASD. *Nature*.  
628 2022;611:532–539.
- 629 9. Bethlehem RAI, Seidlitz J, White SR, Vogel JW, Anderson KM, Adamson C, et al.  
630 Brain charts for the human lifespan. *Nature*. 2022;604:525–533.
- 631 10. van Rooij D, Anagnostou E, Arango C, Auzias G, Behrmann M, Busatto GF, et al.  
632 Cortical and Subcortical Brain Morphometry Differences Between Patients With Autism  
633 Spectrum Disorder and Healthy Individuals Across the Lifespan: Results From the  
634 ENIGMA ASD Working Group. *Am J Psychiatry*. 2018;175:359–369.
- 635 11. Bedford SA, Park MTM, Devenyi GA, Tullo S, Germann J, Patel R, et al. Large-scale  
636 analyses of the relationship between sex, age and intelligence quotient heterogeneity and  
637 cortical morphometry in autism spectrum disorder. *Mol Psychiatry*. 2020;25:614–628.
- 638 12. Buch AM, Vértes PE, Seidlitz J, Kim SH, Gosenick L, Liston C. Molecular and  
639 network-level mechanisms explaining individual differences in autism spectrum  
640 disorder. *Nat Neurosci*. 2023;26:650–663.
- 641 13. Shan X, Uddin LQ, Xiao J, He C, Ling Z, Li L, et al. Mapping the Heterogeneous Brain  
642 Structural Phenotype of Autism Spectrum Disorder Using the Normative Model. *Biol*  
643 *Psychiatry*. 2022;91:967–976.
- 644 14. Hwang G, Wen J, Sotardi S, Brodtkin ES, Chand GB, Dwyer DB, et al. Three imaging  
645 endophenotypes characterize neuroanatomical heterogeneity of autism spectrum  
646 disorder. *bioRxiv*. 2022.
- 647 15. Pretzsch CM, Schäfer T, Lombardo MV, Warriier V, Mann C, Bletsch A, et al.  
648 Neurobiological Correlates of Change in Adaptive Behavior in Autism. *Am J*

- 649 Psychiatry. 2022;179:336–349.
- 650 16. Bethlehem RAI, Seidlitz J, Romero-Garcia R, Trakoshis S, Dumas G, Lombardo MV. A  
651 normative modelling approach reveals age-atypical cortical thickness in a subgroup of  
652 males with autism spectrum disorder. *Commun Biol.* 2020;3:486.
- 653 17. Lombardo MV, Eyer L, Pramparo T, Gazestani VH, Hagler DJ Jr, Chen C-H, et al.  
654 Atypical genomic cortical patterning in autism with poor early language outcome. *Sci*  
655 *Adv.* 2021;7:eabh1663.
- 656 18. Alemany S, Blok E, Jansen PR, Muetzel RL, White T. Brain morphology, autistic traits,  
657 and polygenic risk for autism: A population-based neuroimaging study. *Autism Res.*  
658 2021;14:2085–2099.
- 659 19. Arunachalam Chandran V, Pliatsikas C, Neufeld J, O’Connell G, Haffey A, DeLuca V,  
660 et al. Brain structural correlates of autistic traits across the diagnostic divide: A grey  
661 matter and white matter microstructure study. *Neuroimage Clin.* 2021;32:102897.
- 662 20. Hazlett HC, Gu H, Munsell BC, Kim SH, Styner M, Wolff JJ, et al. Early brain  
663 development in infants at high risk for autism spectrum disorder. *Nature.* 2017;542:348–  
664 351.
- 665 21. Hazlett HC, Poe M, Gerig G, Styner M, Chappell C, Smith RG, et al. Early Brain  
666 Overgrowth in Autism Associated with an Increase in Cortical Surface Area Before Age  
667 2 years. *Arch Gen Psychiatry.* 2011;68:467–476.
- 668 22. Warriar V, Stauffer E-M, Huang QQ, Wigdor EM, Slob EAW, Seidlitz J, et al. Genetic  
669 insights into human cortical organization and development through genome-wide  
670 analyses of 2,347 neuroimaging phenotypes. *Nat Genet.* 2023;55:1483–1493.
- 671 23. Warriar V, Zhang X, Reed P, Havdahl A, Moore TM, Cliquet F, et al. Genetic correlates  
672 of phenotypic heterogeneity in autism. *Nat Genet.* 2022. 2 June 2022.  
673 <https://doi.org/10.1038/s41588-022-01072-5>.
- 674 24. Weiner DJ, Wigdor EM, Ripke S, Walters RK, Kosmicki JA, Grove J, et al. Polygenic  
675 transmission disequilibrium confirms that common and rare variation act additively to  
676 create risk for autism spectrum disorders. *Nat Genet.* 2017;49:978–985.
- 677 25. Rolland T, Cliquet F, Anney R JL, Moreau C, Traut N, Mathieu A, et al. Phenotypic  
678 effects of genetic variants associated with autism. *Nat Med.* 2023;29:1671–1680.
- 679 26. Khundrakpam B, Vainik U, Gong J, Al-Sharif N, Bhutani N, Kiar G, et al. Neural  
680 correlates of polygenic risk score for autism spectrum disorders in general population.  
681 *Brain Commun.* 2020;2:fcaa092.
- 682 27. Sha Z, Schijven D, Francks C. Patterns of brain asymmetry associated with polygenic  
683 risks for autism and schizophrenia implicate language and executive functions but not  
684 brain masculinization. *Mol Psychiatry.* 2021;26:7652–7660.
- 685 28. Shen X, Howard DM, Adams MJ, Hill WD, Clarke T-K, Major Depressive Disorder  
686 Working Group of the Psychiatric Genomics Consortium, et al. A phenome-wide  
687 association and Mendelian Randomisation study of polygenic risk for depression in UK  
688 Biobank. *Nat Commun.* 2020;11:2301.
- 689 29. Stauffer E-M, Bethlehem RAI, Warriar V, Murray GK, Romero-Garcia R, Seidlitz J, et  
690 al. Grey and white matter microstructure is associated with polygenic risk for  
691 schizophrenia. *Mol Psychiatry.* 2021;26:7709–7718.
- 692 30. Stauffer E-M, Bethlehem RAI, Dorfschmidt L, Won H, Warriar V, Bullmore ET. The  
693 genetic relationships between brain structure and schizophrenia. *Nat Commun.*  
694 2023;14:7820.
- 695 31. Floris DL, Peng H, Warriar V, Lombardo MV, Pretzsch CM, Moreau C, et al. The Link  
696 Between Autism and Sex-Related Neuroanatomy, and Associated Cognition and Gene  
697 Expression. *Am J Psychiatry.* 2023;180:50–64.

- 698 32. Ritchie SJ, Cox SR, Shen X, Lombardo MV, Reus LM, Alloza C, et al. Sex Differences  
699 in the Adult Human Brain: Evidence from 5216 UK Biobank Participants. *Cereb Cortex*.  
700 2018;28:2959–2975.
- 701 33. Wierenga LM, Doucet GE, Dima D, Agartz I, Aghajani M, Akudjedu TN, et al. Greater  
702 male than female variability in regional brain structure across the lifespan. *Hum Brain*  
703 *Mapp*. 2022;43:470–499.
- 704 34. Williams CM, Peyre H, Toro R, Ramus F. Neuroanatomical norms in the UK Biobank:  
705 The impact of allometric scaling, sex, and age. *Hum Brain Mapp*. 2021;42:4623–4642.
- 706 35. Lai M-C, Szatmari P. Sex and gender impacts on the behavioural presentation and  
707 recognition of autism. *Curr Opin Psychiatry*. 2020;33:117–123.
- 708 36. Loomes R, Hull L, Mandy WPL. What Is the Male-to-Female Ratio in Autism Spectrum  
709 Disorder? A Systematic Review and Meta-Analysis. *J Am Acad Child Adolesc*  
710 *Psychiatry*. 2017;56:466–474.
- 711 37. Yeo BTT, Krienen FM, Sepulcre J, Sabuncu MR, Lashkari D, Hollinshead M, et al. The  
712 organization of the human cerebral cortex estimated by intrinsic functional connectivity.  
713 *J Neurophysiol*. 2011;106:1125–1165.
- 714 38. Mesulam MM. From sensation to cognition. *Brain*. 1998;121 ( Pt 6):1013–1052.
- 715 39. Sudlow C, Gallacher J, Allen N, Beral V, Burton P, Danesh J, et al. UK Biobank: An  
716 Open Access Resource for Identifying the Causes of a Wide Range of Complex  
717 Diseases of Middle and Old Age. *PLoS Med*. 2015;12:e1001779.
- 718 40. Casey BJ, Cannonier T, Conley MI, Cohen AO, Barch DM, Heitzeg MM, et al. The  
719 Adolescent Brain Cognitive Development (ABCD) study: Imaging acquisition across 21  
720 sites. *Dev Cogn Neurosci*. 2018. 14 March 2018.  
721 <https://doi.org/10.1016/J.DCN.2018.03.001>.
- 722 41. Fischl B, van der Kouwe A, Destrieux C, Halgren E, Ségonne F, Salat DH, et al.  
723 Automatically parcellating the human cerebral cortex. *Cereb Cortex*. 2004;14:11–22.
- 724 42. Glasser MF, Coalson TS, Robinson EC, Hacker CD, Harwell J, Yacoub E, et al. A  
725 multi-modal parcellation of human cerebral cortex. *Nature*. 2016;536:171–178.
- 726 43. Rosen AFG, Roalf DR, Ruparel K, Blake J, Seelaus K, Villa LP, et al. Quantitative  
727 assessment of structural image quality. *Neuroimage*. 2018;169:407–418.
- 728 44. Daducci A, Canales-Rodríguez EJ, Zhang H, Dyrby TB, Alexander DC, Thiran J-P.  
729 Accelerated Microstructure Imaging via Convex Optimization (AMICO) from diffusion  
730 MRI data. *Neuroimage*. 2015;105:32–44.
- 731 45. de Groot M, Vernooij MW, Klein S, Ikram MA, Vos FM, Smith SM, et al. Improving  
732 alignment in Tract-based spatial statistics: evaluation and optimization of image  
733 registration. *Neuroimage*. 2013;76:400–411.
- 734 46. Bycroft C, Freeman C, Petkova D, Band G, Elliott LT, Sharp K, et al. The UK Biobank  
735 resource with deep phenotyping and genomic data. *Nature*. 2018;562:203–209.
- 736 47. Warrier V, Kwong ASF, Luo M, Dalvie S, Croft J, Sallis HM, et al. Gene–environment  
737 correlations and causal effects of childhood maltreatment on physical and mental health:  
738 a genetically informed approach. *The Lancet Psychiatry*. 2021;8:373–386.
- 739 48. Ge T, Chen C-Y, Ni Y, Feng Y-CA, Smoller JW. Polygenic prediction via Bayesian  
740 regression and continuous shrinkage priors. *Nat Commun*. 2019;10:1776.
- 741 49. Bybjerg-Grauholm J, Bøcker Pedersen C, Bækvad-Hansen M, Giørtz Pedersen M,  
742 Adamsen D, Sørensen Hansen C, et al. The iPSYCH2015 Case-Cohort sample: updated  
743 directions for unravelling genetic and environmental architectures of severe mental  
744 disorders. *bioRxiv*. 2020.
- 745 50. Benjamini Y, Hochberg Y. Controlling the false discovery rate: A practical and  
746 powerful approach to multiple testing. *J R Stat Soc*. 1995;57:289–300.

- 747 51. Bulik-Sullivan B, Finucane HK, Anttila V, Gusev A, Day FR, Loh P-R, et al. An atlas of  
748 genetic correlations across human diseases and traits. *Nat Genet.* 2015;47:1236–1241.
- 749 52. 1000 Genomes Project Consortium, Auton A, Brooks LD, Durbin RM, Garrison EP,  
750 Kang HM, et al. A global reference for human genetic variation. *Nature.* 2015;526:68–  
751 74.
- 752 53. Alexander-Bloch AF, Shou H, Liu S, Satterthwaite TD, Glahn DC, Shinohara RT, et al.  
753 On testing for spatial correspondence between maps of human brain structure and  
754 function. *Neuroimage.* 2018;178:540–551.
- 755 54. Jiang L, Zheng Z, Qi T, Kemper KE, Wray NR, Visscher PM, et al. A resource-efficient  
756 tool for mixed model association analysis of large-scale data. *Nat Genet.* 2019;51:1749–  
757 1755.
- 758 55. Hemani G, Zheng J, Elsworth B, Wade KH, Haberland V, Baird D, et al. The MR-Base  
759 platform supports systematic causal inference across the human phenome. *Elife.* 2018;7.
- 760 56. Hemani G, Tilling K, Davey Smith G. Orienting the causal relationship between  
761 imprecisely measured traits using GWAS summary data. *PLoS Genet.*  
762 2017;13:e1007081.
- 763 57. Verbanck M, Chen C-Y, Neale B, Do R. Detection of widespread horizontal pleiotropy  
764 in causal relationships inferred from Mendelian randomization between complex traits  
765 and diseases. *Nat Genet.* 2018;50:693–698.
- 766 58. Khundrakpam B, Bhutani N, Vainik U, Gong J, Al-Sharif N, Dagher A, et al. A critical  
767 role of brain network architecture in a continuum model of autism spectrum disorders  
768 spanning from healthy individuals with genetic liability to individuals with ASD. *Mol*  
769 *Psychiatry.* 2023;28:1210–1218.
- 770 59. Grussu F, Schneider T, Tur C, Yates RL, Tachrount M, Ianuș A, et al. Neurite  
771 dispersion: a new marker of multiple sclerosis spinal cord pathology? *Ann Clin Transl*  
772 *Neurol.* 2017;4:663–679.
- 773 60. Gong N-J, Dibb R, Pletnikov M, Benner E, Liu C. Imaging microstructure with  
774 diffusion and susceptibility MR: neuronal density correlation in Disrupted-in-  
775 Schizophrenia-1 mutant mice. *NMR Biomed.* 2020;33:e4365.
- 776 61. Genc S, Malpas CB, Holland SK, Beare R, Silk TJ. Neurite density index is sensitive to  
777 age related differences in the developing brain. *Neuroimage.* 2017;148:373–380.
- 778 62. Slater DA, Melie-Garcia L, Preisig M, Kherif F, Lutti A, Draganski B. Evolution of  
779 white matter tract microstructure across the life span. *Hum Brain Mapp.* 2019;40:2252–  
780 2268.
- 781 63. Andica C, Kamagata K, Kirino E, Uchida W, Irie R, Murata S, et al. Neurite orientation  
782 dispersion and density imaging reveals white matter microstructural alterations in adults  
783 with autism. *Mol Autism.* 2021;12:48.
- 784 64. Arai T, Kamagata K, Uchida W, Andica C, Takabayashi K, Saito Y, et al. Reduced  
785 neurite density index in the prefrontal cortex of adults with autism assessed using neurite  
786 orientation dispersion and density imaging. *Front Neurol.* 2023;14:1110883.
- 787 65. Carper RA, Treiber JM, White NS, Kohli JS, Müller R-A. Restriction Spectrum Imaging  
788 As a Potential Measure of Cortical Neurite Density in Autism. *Front Neurosci.*  
789 2016;10:610.
- 790 66. Barnett BR, Torres-Velázquez M, Yi SY, Rowley PA, Sawin EA, Rubinstein CD, et al.  
791 Sex-specific deficits in neurite density and white matter integrity are associated with  
792 targeted disruption of exon 2 of the *Disc1* gene in the rat. *Transl Psychiatry.* 2019;9:82.
- 793 67. Lee E, Lee J, Kim E. Excitation/Inhibition Imbalance in Animal Models of Autism  
794 Spectrum Disorders. *Biol Psychiatry.* 2017;81:838–847.
- 795 68. Stoner R, Chow ML, Boyle MP, Sunkin SM, Mouton PR, Roy S, et al. Patches of

Autism PGS and cortical structure

- 796 disorganization in the neocortex of children with autism. *N Engl J Med.* 2014;370:1209–  
797 1219.
- 798 69. Casanova MF, Buxhoeveden DP, Switala AE, Roy E. Minicolumnar pathology in  
799 autism. *Neurology.* 2002;58:428–432.
- 800 70. Kamiya K, Hori M, Aoki S. NODDI in clinical research. *J Neurosci Methods.*  
801 2020;346:108908.
- 802 71. Kraguljac NV, Guerreri M, Strickland MJ, Zhang H. Neurite Orientation Dispersion and  
803 Density Imaging in Psychiatric Disorders: A Systematic Literature Review and a  
804 Technical Note. *Biological Psychiatry Global Open Science.* 2023;3:10.
- 805 72. Morgan SE, Seidlitz J, Whitaker KJ, Romero-Garcia R, Clifton NE, Scarpazza C, et al.  
806 Cortical patterning of abnormal morphometric similarity in psychosis is associated with  
807 brain expression of schizophrenia-related genes. *Proc Natl Acad Sci U S A.*  
808 2019;116:9604–9609.
- 809 73. Weiner DJ, Ling E, Erdin S, Tai DJC, Yadav R, Grove J, et al. Statistical and functional  
810 convergence of common and rare genetic influences on autism at chromosome 16p. *Nat*  
811 *Genet.* 2022;54:1630–1639.
- 812 74. Ding Y, Hou K, Xu Z, Pimplaskar A, Petter E, Boulier K, et al. Polygenic scoring  
813 accuracy varies across the genetic ancestry continuum. *Nature.* 2023. 17 May 2023.  
814 <https://doi.org/10.1038/s41586-023-06079-4>.

UK Biobank (N = 31,748)  
Older adults (45-81 years old)

ABCD (N = 4,928)  
Children (9 – 11 years old)

**GWAS for Autism**  
(Bybjerg-Grauholm et al. 2020)

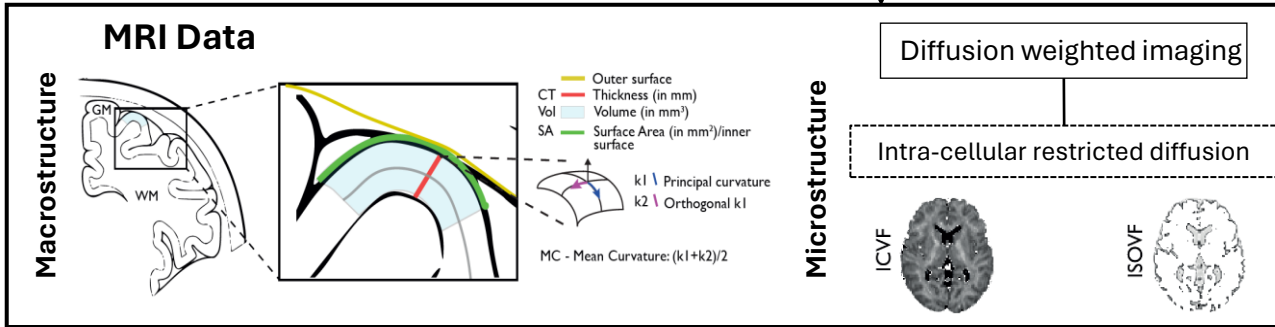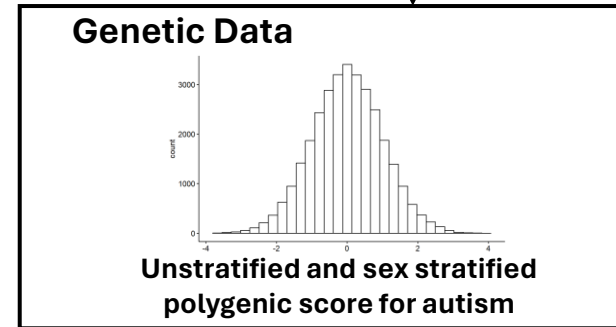

To inform PRS-CS which common variant to include for polygenic score calculation

**Fixed-Effect Linear Regression Model**

$$\text{MRI} \sim \beta \text{PGS} + \text{covariates} + e$$

- Hypothesis 1: Autism PGS have effect on MRI phenotypes
- Hypothesis 2: Autism PGS have sex-differentiating effects on MRI phenotypes
- Hypothesis 3: Sex stratified Autism PGS have sex specific effect on MRI phenotypes

Global Cortical Association

Regional Cortical Association

**GWAS for Global and Regional MRI phenotypes**  
(Warrier et.al, 2023)

**Follow-up Studies**

- Robustness: Genetic correlations
- Causality: Mendelian randomization
- Enrichment: Functional network and hubness analyses



**A**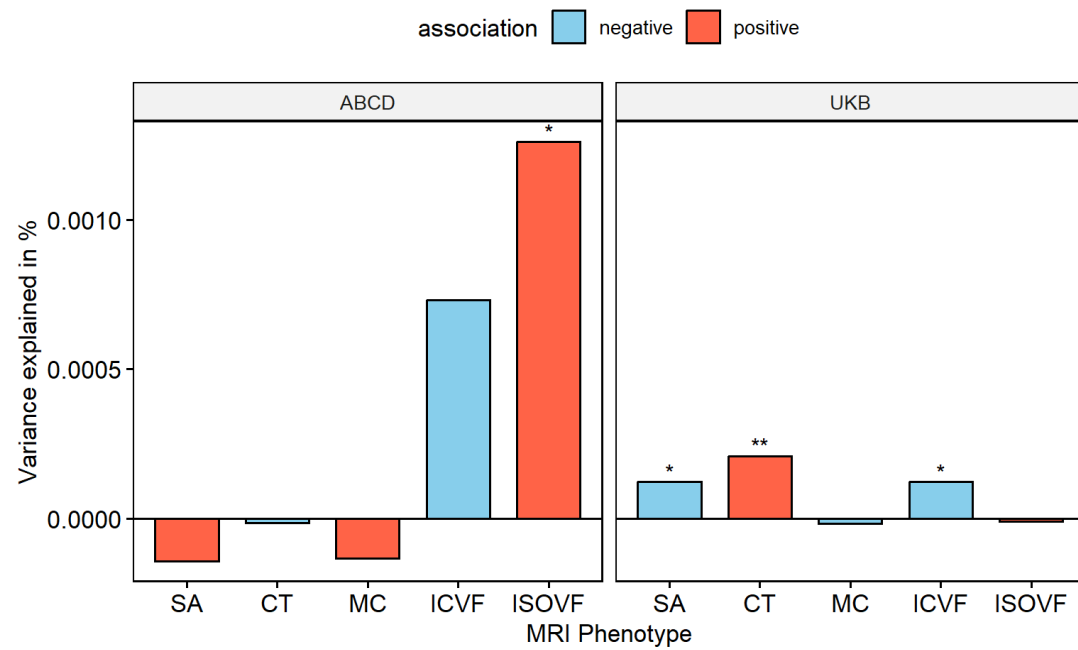**B**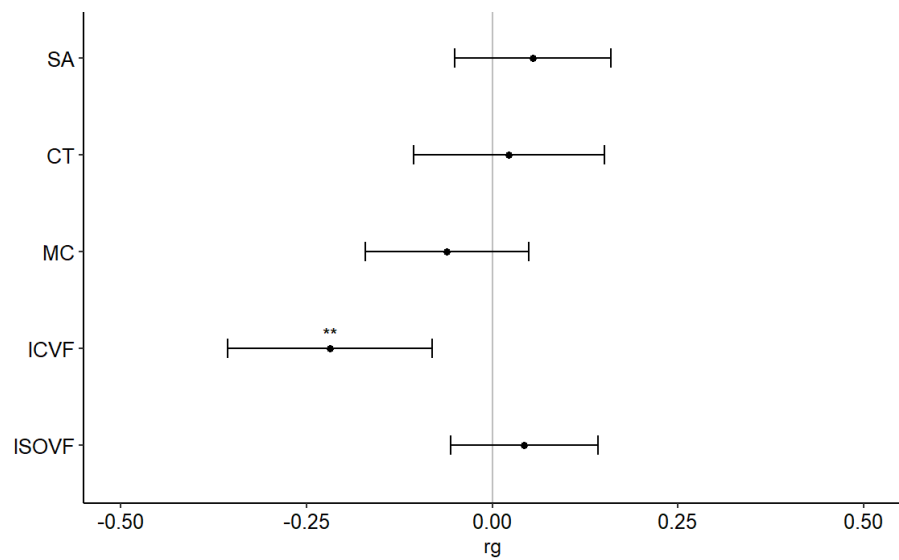

**A**

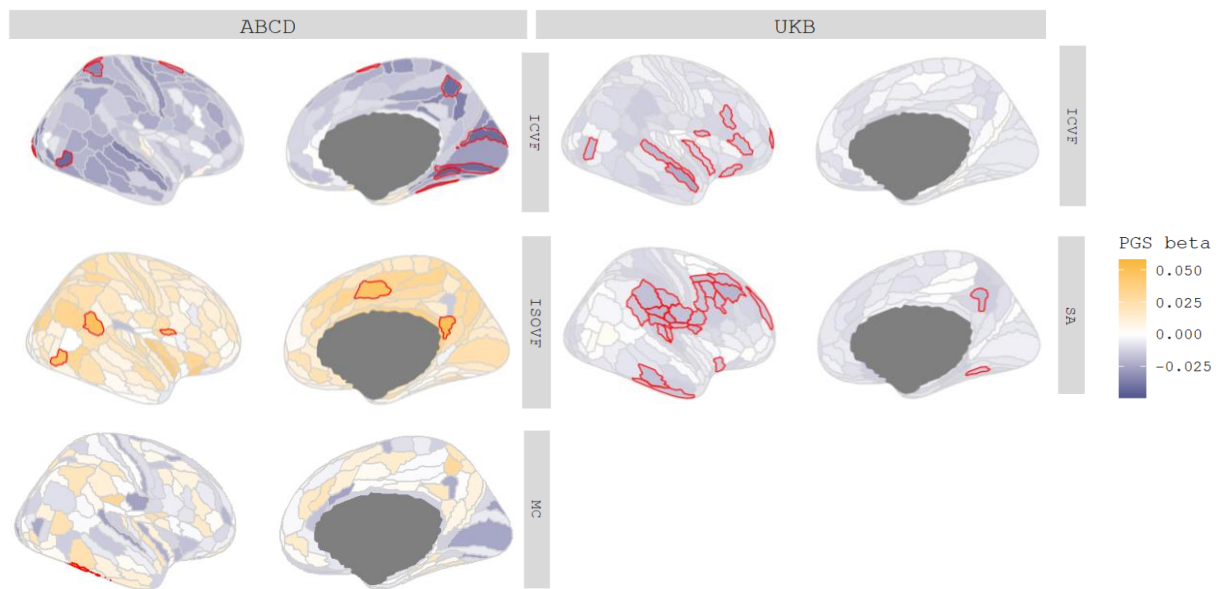

**B**

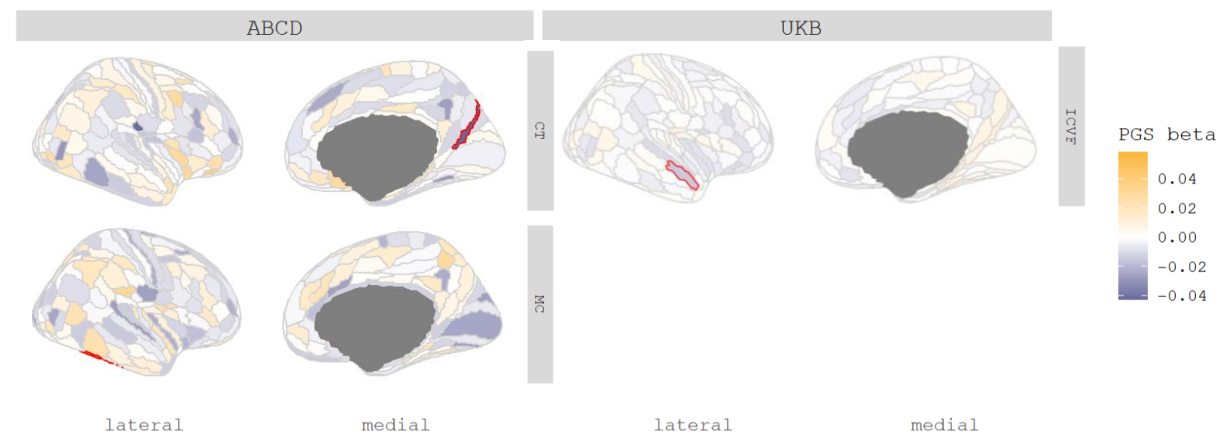

**C**

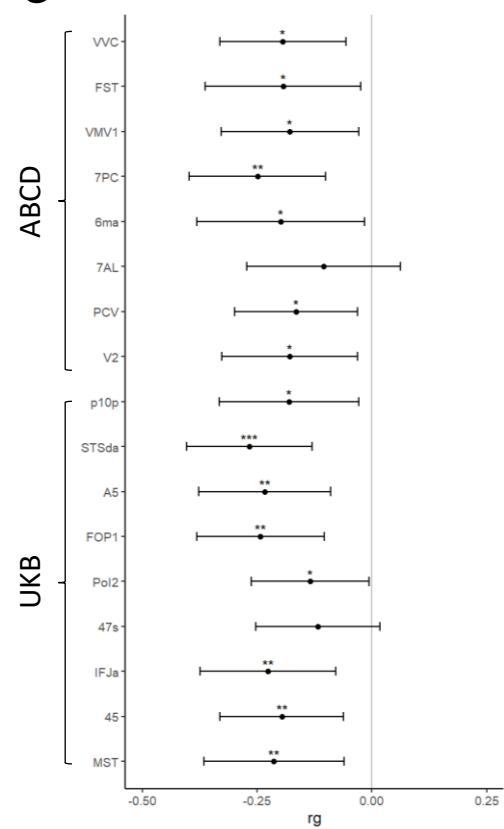

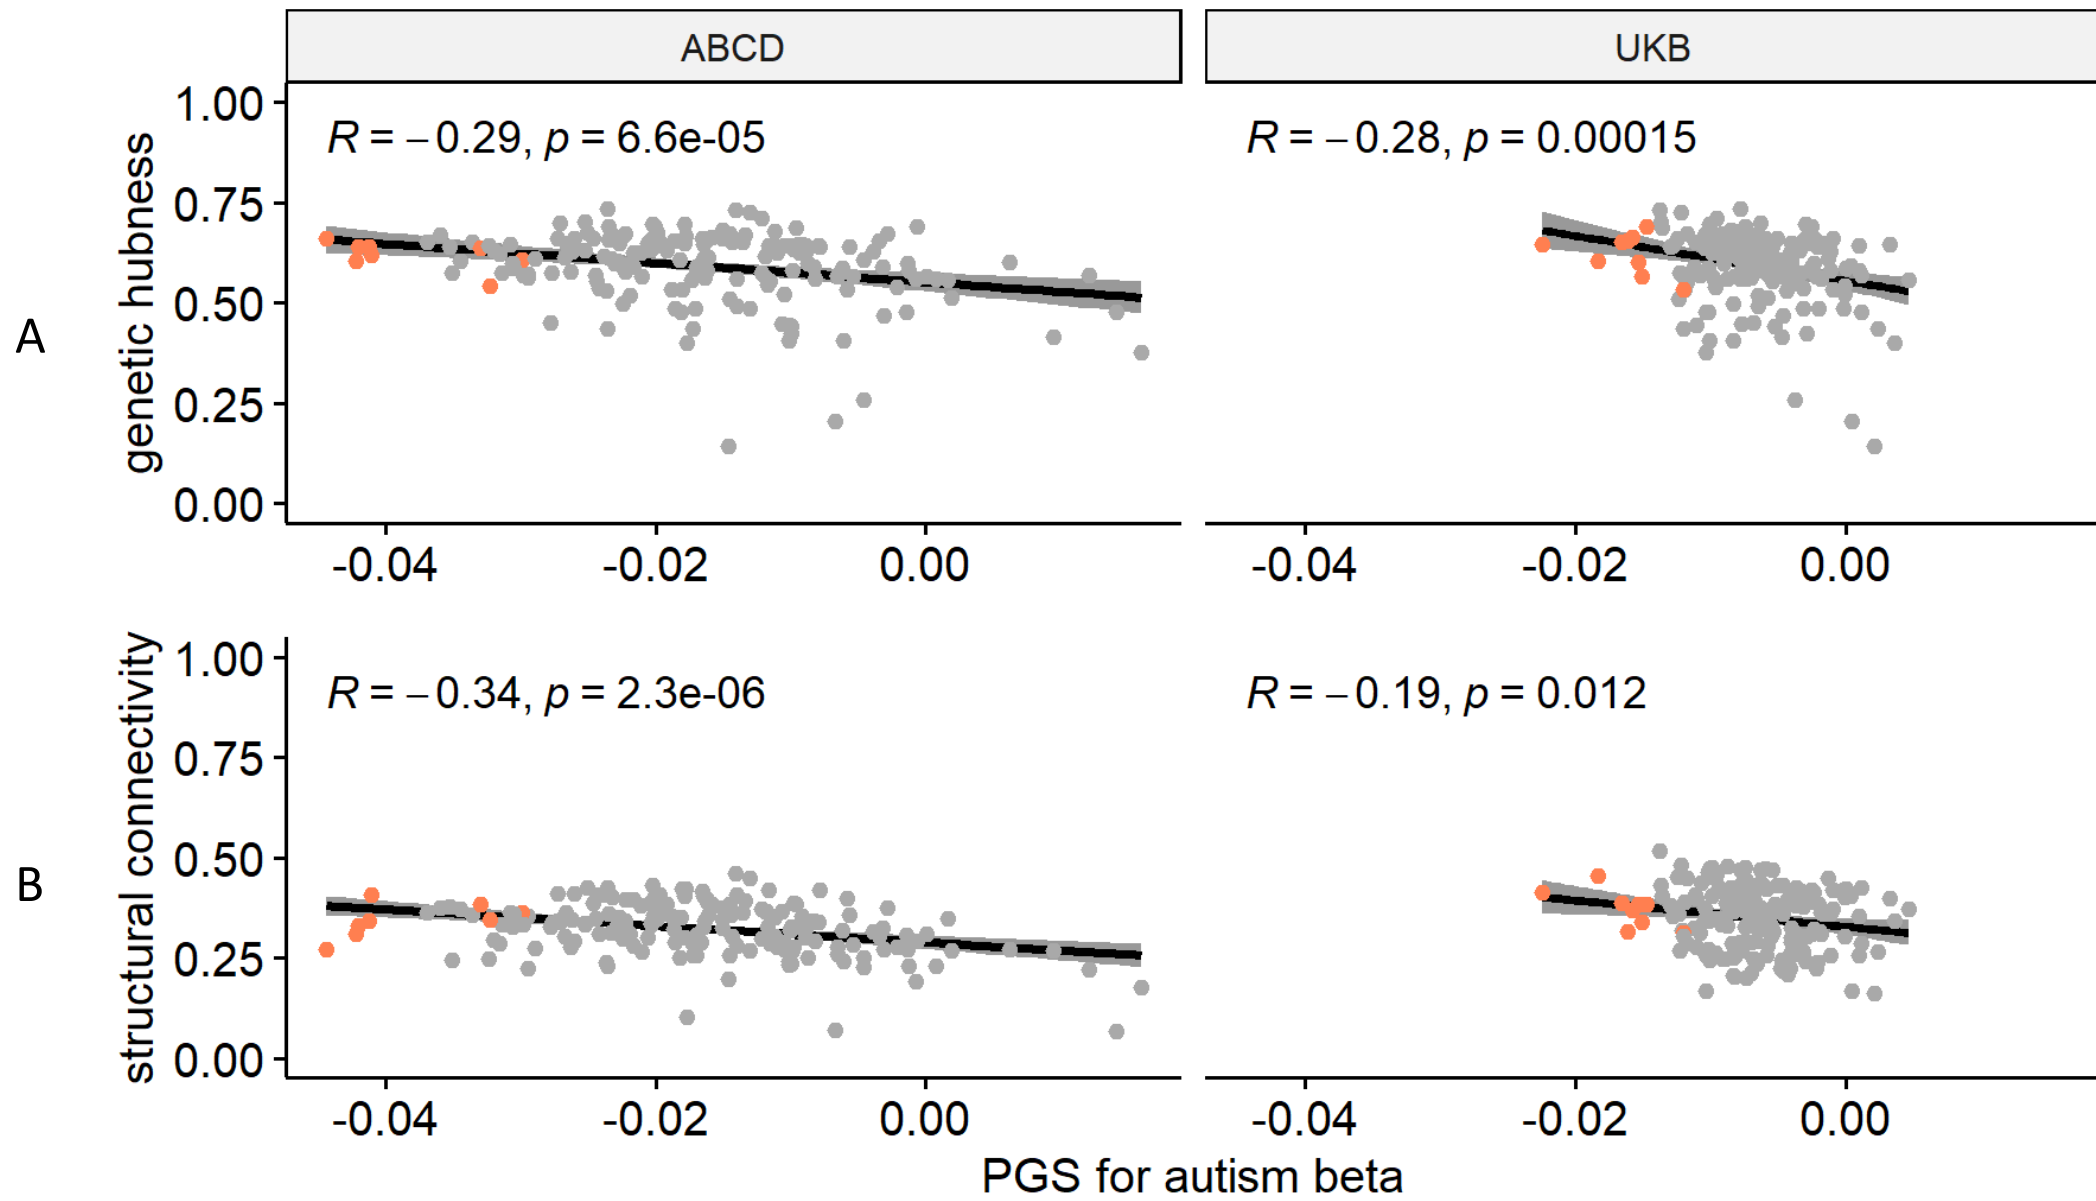

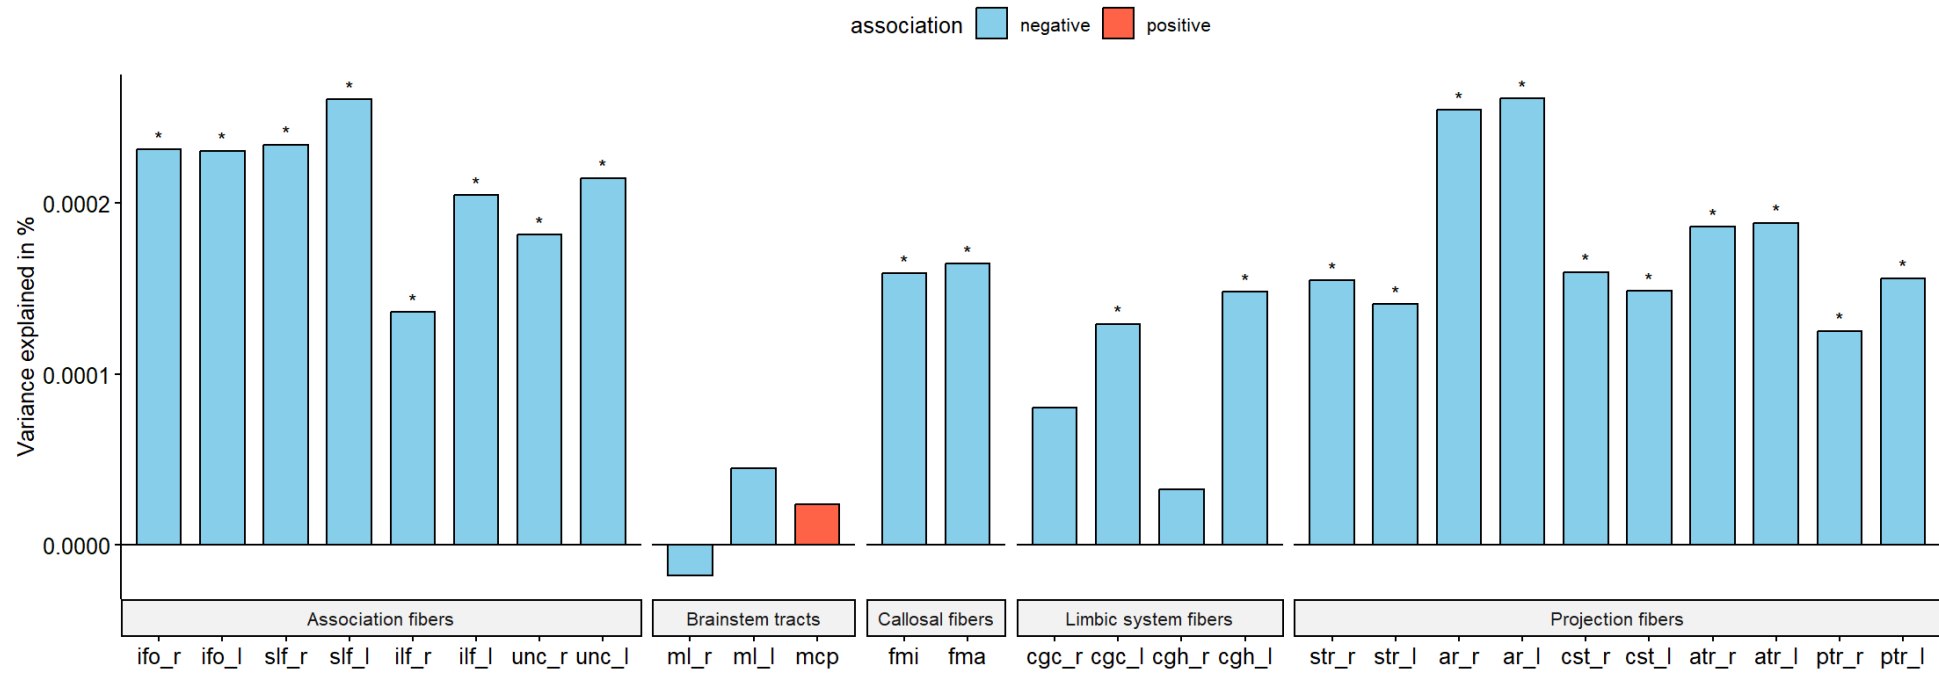

association    negative    positive

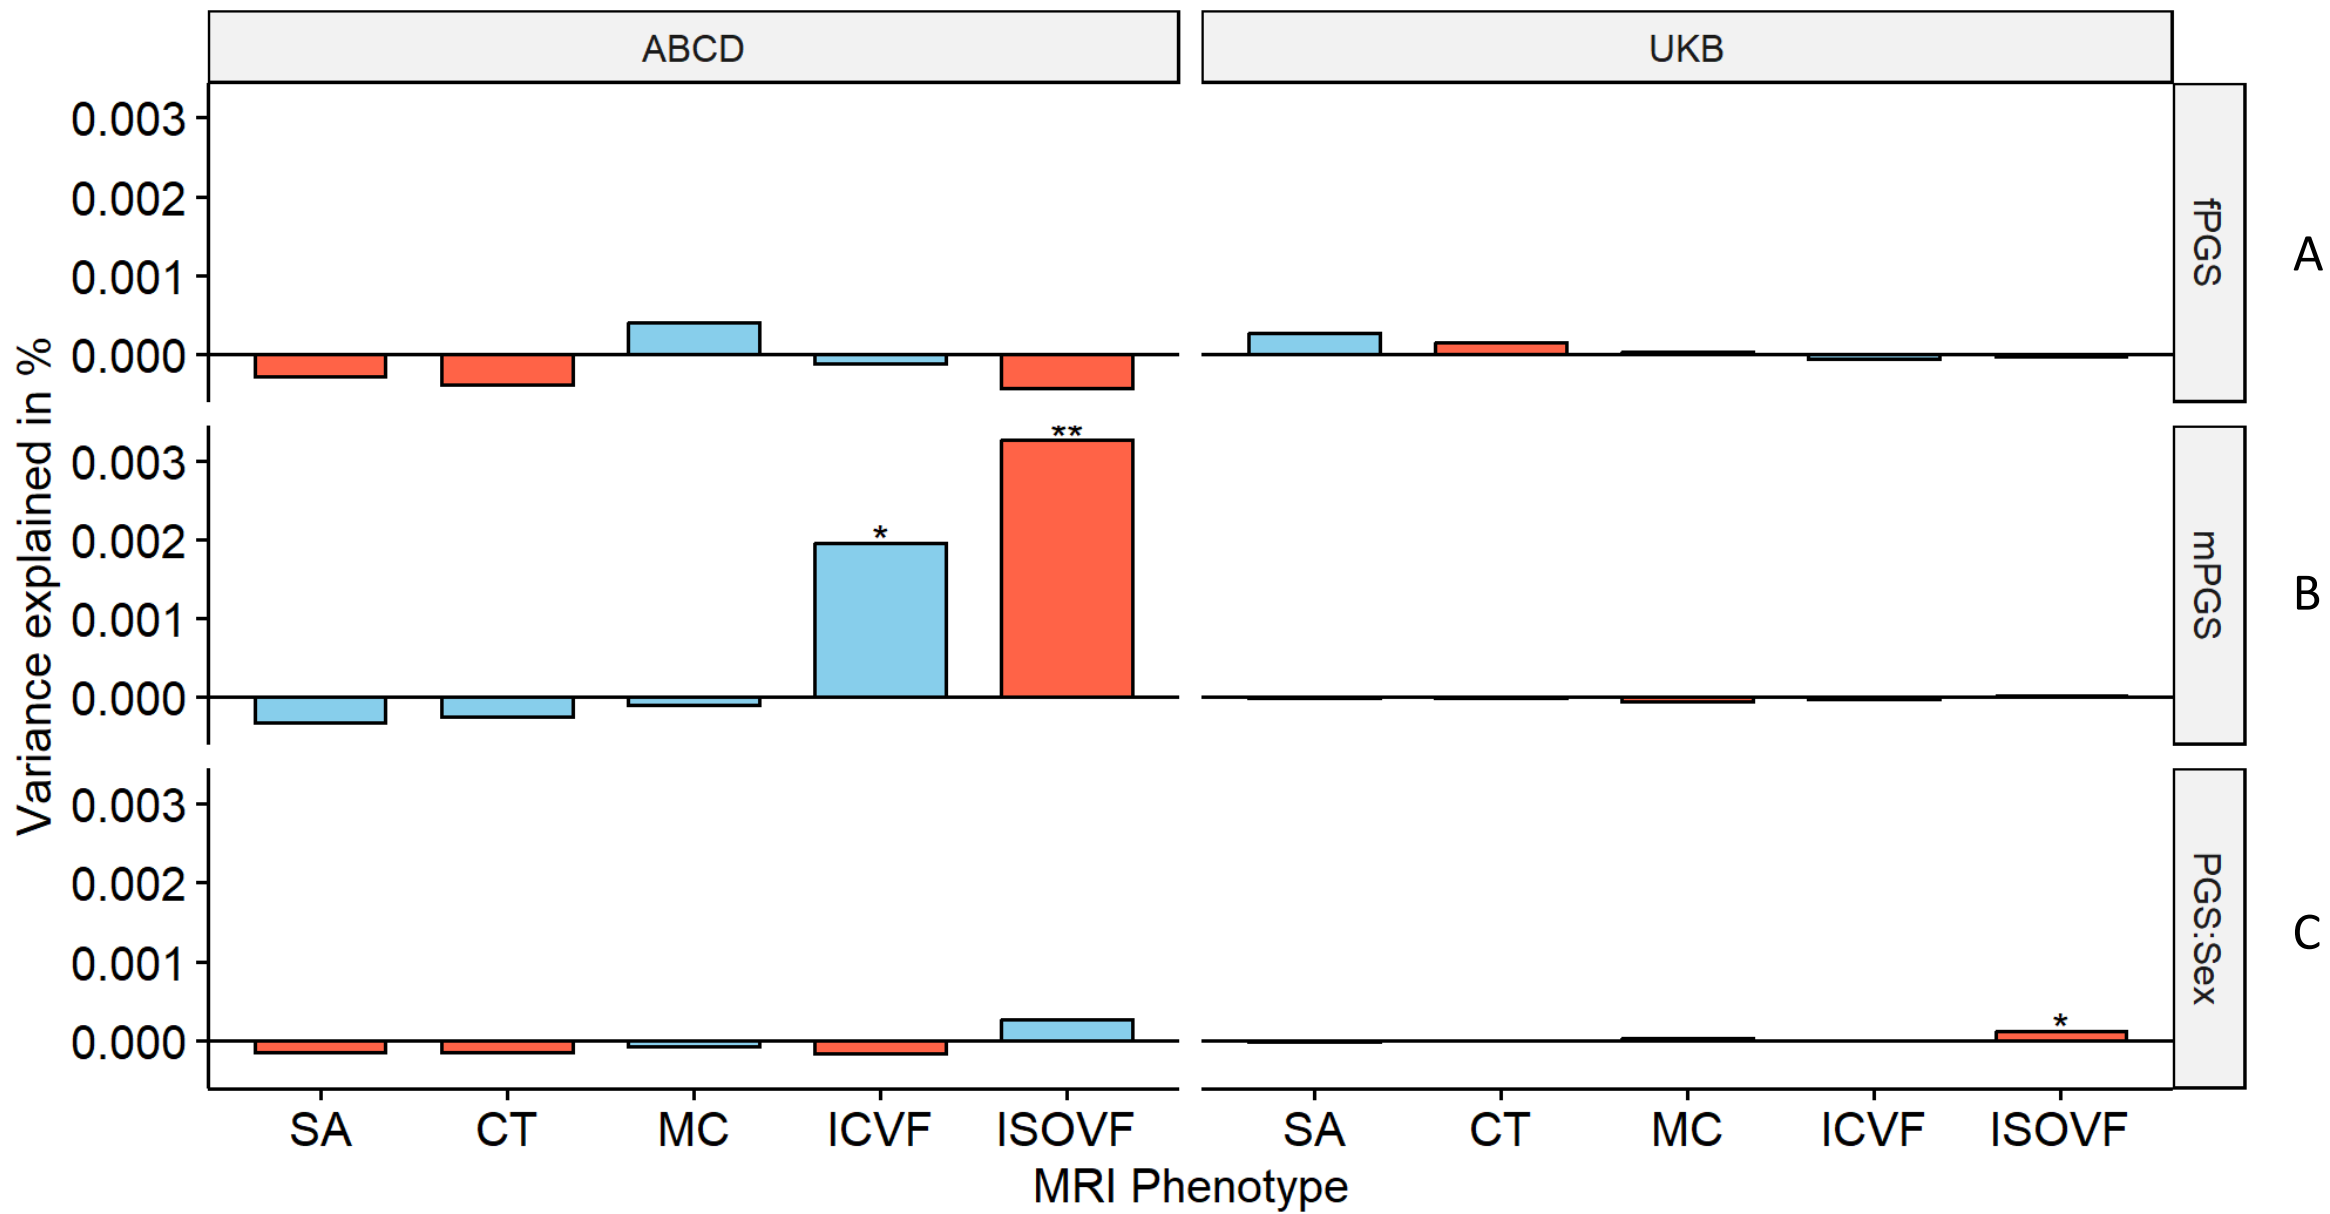

Source: https://medrxiv.org/content/10.1101/2024.04.10.24305539.full.pdf
